# Supplementary material for: Costs for collagenase injections compared with fasciectomy in the treatment of Dupuytren's contracture: a retrospective cohort study
Source: PubMed Central journal article supplement — BMJ Open. 2014 Jan 15;4(1):e004166. doi: 10.1136/bmjopen-2013-004166 (PMC3902506; doi:10.1136/bmjopen-2013-004166), 2014-01-15
Supplement: bmjopen-2013-004166.draft_revisions.pdf [file bmjopen-2013-004166.draft_revisions.pdf]

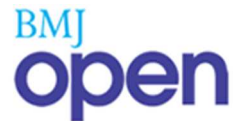

**Lower costs for collagenase injections than fasciectomy in the treatment of Dupuytren's contracture: A single-centre controlled cohort study**

|                                 |                                                                                                                                                                                                                                                                                                                                                                                                   |
|---------------------------------|---------------------------------------------------------------------------------------------------------------------------------------------------------------------------------------------------------------------------------------------------------------------------------------------------------------------------------------------------------------------------------------------------|
| Journal:                        | <i>BMJ Open</i>                                                                                                                                                                                                                                                                                                                                                                                   |
| Manuscript ID:                  | bmjopen-2013-004166                                                                                                                                                                                                                                                                                                                                                                               |
| Article Type:                   | Research                                                                                                                                                                                                                                                                                                                                                                                          |
| Date Submitted by the Author:   | 03-Oct-2013                                                                                                                                                                                                                                                                                                                                                                                       |
| Complete List of Authors:       | Strandberg, Emelie; Hässleholm Hospital, Department of Orthopedics<br>Lauritzson, Anna; Hässleholm Hospital, Department of Orthopedics<br>Waldén, Markus; Linköping University, Department of Medical and Health Sciences<br>Ahlgren, Eva; Hässleholm Hospital, Department of Orthopedics<br>Atroshi, Isam; Clinical Sciences, Lund University, Department of Orthopedics Hässleholm-Kristianstad |
| <b>Primary Subject Heading</b>: | Health economics                                                                                                                                                                                                                                                                                                                                                                                  |
| Secondary Subject Heading:      | Surgery                                                                                                                                                                                                                                                                                                                                                                                           |
| Keywords:                       | Hand & wrist < ORTHOPAEDIC & TRAUMA SURGERY, Musculoskeletal disorders < ORTHOPAEDIC & TRAUMA SURGERY, Orthopaedic & trauma surgery < SURGERY                                                                                                                                                                                                                                                     |
|                                 |                                                                                                                                                                                                                                                                                                                                                                                                   |

SCHOLARONE™  
Manuscripts

Only

1  
2  
3 1 **Lower costs for collagenase injections than fasciectomy in the treatment of**

4  
5  
6 2 **Dupuytren's contracture: A single-centre controlled cohort study**

7  
8  
9  
10  
11  
12 5 Emelie Strandberg, MS (Econ),<sup>1</sup> Anna Lauritzson, OT,<sup>1</sup> Markus Waldén, MD, PhD,<sup>1,2</sup>

13  
14 6 Eva Ahlgren, RN,<sup>1</sup> Isam Atroshi, MD, PhD<sup>1,3</sup>

15  
16  
17  
18 8 <sup>1</sup>Department of Orthopedics Hässleholm-Kristianstad, Hässleholm Hospital, Hässleholm,

19  
20  
21 9 Sweden

22  
23 10 <sup>2</sup>Department of Medical and Health Sciences, Linköping University, Linköping, Sweden

24  
25 11 <sup>3</sup>Department of Clinical Sciences, Lund University, Lund, Sweden

26  
27  
28  
29  
30 13 Correspondence:

31  
32 14 Isam Atroshi, Department of Orthopedics, Hässleholm Hospital, SE28125 Hässleholm,

33  
34 15 Sweden. Tel:+46443091279, E-mail: [Isam.Atroshi@skane.se](mailto:Isam.Atroshi@skane.se)

35  
36  
37 16  
38  
39 17 Word count: 3307

1  
2  
3 18 **Abstract**  
4  
5  
6

7  
8  
9  
10 19

20 **Objectives:** The aim of this controlled cohort study of Dupuytren's contracture (DC) was to  
21 compare collagenase injections with surgery (fasciectomy) with regard to the actual total  
22 direct treatment costs and short-term outcomes.

23 **Setting:** Orthopaedic department of a regional hospital in Sweden.

24 **Participants:** Patients aged 65 years or older with previously untreated DC of 30 degrees or  
25 greater in the metacarpophalangeal (MCP) or proximal interphalangeal (PIP) joints of the  
26 small, ring or middle finger. The collagenase group comprised 16 consecutive patients treated  
27 during the first 6 months following the introduction of collagenase as treatment for DC at the  
28 study centre. The controls were 16 patients randomly selected among those operated on with  
29 fasciectomy at the same centre during the preceding 3 years.

30 **Interventions:** Treatment with collagenase was given during two standard outpatient clinic  
31 visits (injection and next-day finger extension under local anaesthesia) followed by night-time  
32 splinting. Fasciectomy was done in the operating room (day surgery) under general or  
33 regional anaesthesia using standard technique, followed by therapy and splinting.

34 **Primary and secondary outcome measures:** Actual total direct costs (salaries of all medical  
35 personnel involved in care, medications, materials and other relevant costs), and total MCP  
36 and PIP extension deficit (degrees) measured by hand therapists at 6-12 weeks after treatment.

37 **Results:** Collagenase injection required fewer hospital outpatient visits to a therapist and  
38 nurse than fasciectomy. Total treatment cost for collagenase injection was 1418.04 USD and  
39 for fasciectomy 2102.56 USD. The post-treatment median (interquartile range) total extension  
40 deficit was 10 (0-30) for the collagenase group and 10 (0-34) for the fasciectomy group.

41 **Conclusions:** Treatment of Dupuytren's contracture with collagenase injection costs 33% less  
42 than fasciectomy with equivalent short-term efficacy regarding reduction in contracture.  
43  
44  
45  
46  
47  
48  
49  
50  
51  
52  
53  
54  
55  
56  
57  
58  
59  
60

1  
2  
3 43 **Strengths and limitations of this study**  
4

5 44  
6

7 45 • This study presents previously unknown estimates of the actual costs of treating  
8

9 Dupuytren's contracture with Collagenase injections or fasciectomy  
10

11 47 • Comparison of the actual costs of the two treatments are based on detailed definition and  
12

13 measurement of all relevant costs  
14

15 49 • Outcomes of injections were prospectively measured but outcomes of surgery were based  
16

17 on medical records  
18

19 50  
20 51 • Costs may vary across countries  
21

22 52 • Only short-term outcomes were compared  
23  
24  
25  
26  
27  
28  
29  
30  
31  
32  
33  
34  
35  
36  
37  
38  
39  
40  
41  
42  
43  
44  
45  
46  
47  
48  
49  
50  
51  
52  
53  
54  
55  
56  
57  
58  
59  
60

## 53 INTRODUCTION

54  
55 Dupuytren's contracture (DC) is a common hand disorder causing finger contractures that  
56 may compromise hand function. Surgery in the form of limited fasciectomy has been the main  
57 treatment option for reducing the contracture.<sup>1</sup> In Sweden (population 9.5 millions), more  
58 than 3000 fasciectomy procedures are performed annually;<sup>2</sup> the actual number is probably  
59 higher because procedures performed by surgeons in private practice, although constituting a  
60 small proportion,<sup>3</sup> may not always be reported to the national database. Surgery is usually  
61 done in the main operating room under general or regional anaesthesia and the operating time  
62 is on average about 1 hour,<sup>4</sup> but can be substantially longer when severe contractures are  
63 present in multiple fingers. After surgery many patients require therapy and splints. Although  
64 surgery is often effective in reducing the contracture, postoperative complications such as  
65 nerve injury and wound healing problems are common and patients may develop contracture  
66 recurrence.<sup>5,6</sup>

67  
68 Recently, injection with collagenase clostridium histolyticum (CCH) has been introduced as  
69 the first pharmacological treatment for DC after it was shown in a randomized controlled trial  
70 to be more effective than placebo injections in reducing contractures.<sup>7</sup> The treatment is a  
71 relatively simple procedure given in the outpatient clinic and rarely requires prolonged  
72 therapy. The current price of a CCH injection (in Sweden) is almost one thousand US dollars  
73 (USD) and one injection is used for each finger involved (unless contractures in 2 fingers are  
74 caused by a common cord). Because of economic pressure to control health care expenditures,  
75 the cost-effectiveness of surgical procedures has gained increased significance in hospital  
76 decision making. The cost analysis of different treatment procedures such as fasciectomy and

1  
2  
3 77 injection is therefore essential and the differences in short-term costs associated with these  
4  
5 78 two techniques are important to consider.  
6

7 79

8  
9 80 To our knowledge no previous study has compared the actual costs of CCH injections with  
10  
11 81 those of fasciectomy. One study based on a cost-utility analysis model concluded that open  
12  
13 82 partial fasciectomy did not meet the cost-effectiveness threshold and that CCH injections  
14  
15 83 would be cost-effective when priced below 945 USD.<sup>8</sup> Studies concerning costs of surgery  
16  
17 84 have usually used reimbursement as a measure of costs,<sup>9</sup> but reimbursement does not  
18  
19 85 necessarily reflect the actual cost of a procedure. Reimbursement levels for a certain  
20  
21 86 procedure may vary substantially across and even within countries. For cost comparison of  
22  
23 87 CCH injections and fasciectomy in DC the actual cost of each procedure is therefore a more  
24  
25 88 relevant measure. When comparing the costs of two treatment methods, the outcome of the  
26  
27 89 treatments must also be taken into consideration. However, we could not find studies that  
28  
29 90 have compared the outcomes of CCH and fasciectomy.  
30  
31  
32  
33

34 91

35  
36 92 The main aim of this controlled cohort study was to compare CCH injections with  
37  
38 93 fasciectomy regarding the actual total direct treatment costs. The secondary aim was to  
39  
40 94 compare the short-term outcomes of these two treatment methods.  
41  
42

43 95  
44  
45  
46  
47  
48  
49  
50  
51  
52  
53  
54  
55  
56  
57  
58  
59  
60

1  
2  
3 96 **PATIENTS AND METHODS**  
4  
5

6 97

7  
8 98 **Study participants**

9  
10 99 We conducted a controlled cohort study at one orthopaedic department (Hässleholm,  
11  
12 100 Kristianstad and Ystad Hospitals) in southern Sweden. The department is the only centre that  
13  
14 101 treats patients with DC in a region with approximately 300,000 inhabitants.  
15

16  
17 102

18  
19 103 Data on CCH injections were collected prospectively within a clinical study that started  
20  
21 104 September 2011 when CCH was introduced as the main treatment option for DC at the  
22  
23 105 department. The indication for treatment with CCH injections was identical to that previously  
24  
25 106 used for surgery at the study centre, namely a palpable cord and contracture of 30 degrees or  
26  
27 107 greater in the metacarpophalangeal (MCP) or proximal interphalangeal (PIP) joints. For this  
28  
29 108 study we included the first 16 consecutive patients, aged 65 years or older, treated with CCH  
30  
31 109 injections during the first 6 months (September 2011 through February 2012). We restricted  
32  
33 110 the study to patients of non-working age because we aimed to compare only direct costs.  
34  
35

36  
37 111

38  
39 112 Data on fasciectomy were extracted from the medical records of patients treated at the  
40  
41 113 department before the introduction of CCH injections. The patients were chosen among those  
42  
43 114 aged 65 years or older, operated on with fasciectomy January 2009 through June 2011.

44  
45 115 Patients with surgery on more than 2 fingers, previous surgery for DC in the same hand, and  
46  
47 116 additional procedures performed (e.g. skin graft or amputation) were excluded. A total of 113  
48  
49 117 patients were potentially eligible. Of these, a random sample of 15% was chosen by computer  
50  
51 118 (statistical software), yielding 18 patients; 2 were excluded (1 had surgery for DC in the  
52  
53 119 thumb and 1 chose to have postoperative therapy at another location). Thus, the fasciectomy  
54  
55 120 group included 16 patients.  
56  
57  
58  
59  
60

1  
2  
3 121 **Treatment and follow-up procedures**  
4

5 122 Both treatments required an initial standard outpatient consultation visit to a hand surgeon or  
6  
7 123 an orthopaedic surgeon, usually as a referral from the patient's general practitioner. Each  
8  
9 124 surgeon was assisted by a nurse at the outpatient clinic. During the visit the treatment decision  
10  
11 125 was made and the patient was scheduled for treatment (Fig 1).  
12  
13

14  
15  
16 127 **Collagenase injection:** Treatment with CCH required two standard outpatient visits to a hand  
17  
18 128 surgeon: injection and next-day finger extension under local anaesthesia.<sup>7</sup> During these visits  
19  
20 129 the surgeon was assisted by a nurse (all treatments were given by the same hand surgeon).  
21  
22 130 Immediately after finger extension the patient went to the therapist and received a splint for  
23  
24 131 use at night for 8 weeks. A second visit to the therapist was done 1 week post-injection for  
25  
26 132 splint adjustment and therapy instructions. Patients who during finger extension developed a  
27  
28 133 skin tear that was judged to require dressing change were asked to visit a nurse within 2 to 3  
29  
30 134 days. Further visits to the nurse were done when necessary, depending on wound status. No  
31  
32 135 routine post-treatment visits were scheduled to the treating surgeon and the final follow-up  
33  
34 136 (usually at 5-6 weeks) was done by the therapist who arranged a consultation to the treating  
35  
36 137 surgeon if necessary (consideration for further treatment).  
37  
38  
39  
40  
41

42  
43 139 **Fasciectomy:** Fasciectomy was done as a day-surgery procedure in the main operating room  
44  
45 140 (OR). The surgery was done by one of six different surgeons (three experienced hand  
46  
47 141 surgeons and three orthopaedic surgeons with experience in hand surgery) using standard  
48  
49 142 technique for limited open fasciectomy.<sup>10</sup> General anaesthesia or axillary block was used.  
50  
51 143 According to routine procedures at the hospital general anaesthesia was administered by a  
52  
53 144 nurse anaesthetist and axillary block was administered by an anaesthesiologist, after which  
54  
55 145 the nurse anaesthetist was in charge of the patient's care with anaesthesiologist help obtained  
56  
57  
58  
59  
60



1  
2  
3 146 when needed. The surgery was done by a surgeon (no assistant) with a team consisting of an  
4  
5 147 OR nurse, a nurse anaesthetist and 2 nurse assistants (1 participated only in the initial  
6  
7 148 preparations). The electronic records for each surgical procedure include the exact start and  
8  
9 149 finish times for the preparations before surgery, anaesthesia, the actual surgery (i.e. operating  
10  
11 150 time from incision to dressing), and the work done after the surgeon has completed the  
12  
13 151 operation and until the patient is taken back to the recovery room. After returning from the  
14  
15 152 OR the patient stayed in the recovery room until discharge from the day-surgery unit. The  
16  
17 153 time of discharge is documented in the electronic records. Thus, for each patient 3 times were  
18  
19 154 recorded; the operating time, the total OR time (from start of preparations until room ready  
20  
21 155 for next procedure), and the time at the recovery room until discharge.  
22  
23  
24  
25

26  
27 157 After fasciectomy all patients visited a nurse for dressing change after 5 to 7 days, followed  
28  
29 158 immediately by a visit to a therapist for a splint and therapy instructions. A second visit to the  
30  
31 159 nurse for wound inspection and suture removal was done at approximately 2 weeks. Further  
32  
33 160 visits to the nurse were done when necessary, depending on wound status. Patients also had  
34  
35 161 further visits to the therapist for scar management, splint adjustments and therapy instructions  
36  
37 162 as required. The treating therapist decided on the frequency and duration of therapy. Patients  
38  
39 163 had 1 postoperative follow-up visit to the surgeon timed according to surgeon preference.  
40  
41  
42  
43  
44

#### 45 165 **Cost measurement**

46  
47 166 A detailed analysis of the salaries of physicians and non-physician medical personnel  
48  
49 167 involved in the treatment of patients with DC was performed for CCH injection and  
50  
51 168 fasciectomy. We identified the average salaries of individuals and used the average time units  
52  
53 169 to calculate the cost of manpower. The costs of all materials, premises and other costs were  
54  
55 170 calculated. We included fixed assets such as the costs of the premises and its expenses and the  
56  
57  
58  
59  
60

1  
2  
3 171 costs of surgical equipment. All costs were measured based on 2011 salaries/prices. These  
4  
5 172 costs include; salaries of all medical personnel involved in the direct care of the patients  
6  
7 173 including social security contributions, vacation pay and sick pay (averaged for each category:  
8  
9 174 specialist orthopaedic surgeon, anaesthesiologist, nurse, nurse assistant and therapist),  
10  
11 175 hospital overhead costs, the degree of capacity utilization, medications, surgical and other  
12  
13 176 material, premises and other costs. The average salaries were based on all respective medical  
14  
15 177 personnel group in the public health care sector in the region. We did not include costs of  
16  
17 178 non-medical personnel involved in the care (such as receptionists, secretaries, cleaners, etc).  
18  
19  
20  
21 179

22  
23 180 A standard outpatient visit to a doctor was 20 minutes. For the 2 CCH visits (injection and  
24  
25 181 finger extension) we used the standard time for the surgeon and 25 minutes for the assisting  
26  
27 182 nurse (to account for the time needed for preparations and work after the session had ended).  
28  
29 183 For fasciectomy we used the mean operating time, total OR time and recovery time, according  
30  
31 184 to the personnel involved and adjusted as required. For the operating surgeon we used the  
32  
33 185 mean operating time plus 25 minutes needed for additional work (assessing the patient and  
34  
35 186 marking the surgical site before surgery, scrubbing, writing the surgical notes and discharging  
36  
37 187 the patient after surgery). For the non-physician personnel we used the mean total operating  
38  
39 188 room time and for the anaesthesiologist we used half that time (one anaesthesiologist is  
40  
41 189 usually assigned to 2 operating rooms simultaneously and the care of these patients after  
42  
43 190 surgery). For recovery room personnel (a nurse and a nurse assistant are in charge of up to 5  
44  
45 191 patients simultaneously), we used a fifth of the recovery time plus 5 minutes (preoperative  
46  
47 192 preparations). A standard outpatient visit to a nurse (for wound care after CCH injection or  
48  
49 193 fasciectomy) was 45 minutes. A standard visit to therapist after CCH injection was 30  
50  
51 194 minutes and after fasciectomy 45 minutes. For each patient the exact number of hospital  
52  
53  
54  
55  
56  
57  
58  
59  
60

1  
2  
3 195 outpatient visits to a doctor, nurse or therapist, related to the treatments, was retrieved from  
4  
5 196 the Patient Administrative System.  
6

7 197

### 9 198 **Outcome measurement**

10 199 At baseline and at all follow-up visits range of motion including extension and flexion of the  
11  
12 200 MCP and PIP joints of the fingers was measured with a goniometer. In the fasciectomy group  
13  
14 201 the baseline measurements were done by the surgeons during the visit that resulted in the  
15  
16 202 patient being scheduled for fasciectomy and the post-treatment measurements were done by  
17  
18 203 six different therapists; these measurements were recorded in the patient's electronic medical  
19  
20 204 records. In the CCH group all measurements (immediately before injection and at follow-up)  
21  
22 205 were done by the same therapist, as part of a research project. The measurements recorded at  
23  
24 206 baseline and at the final visit were used in the analysis.  
25  
26  
27  
28

29 207

### 30 208 **Analysis**

31  
32 209 In 2 previous randomized trials the proportion of MCP joints that were reduced to 0 to 5  
33  
34 210 degrees of extension deficit was 45% at 30 days after first CCH injection<sup>7</sup> and 94% at 6  
35  
36 211 weeks after fasciectomy.<sup>11</sup> To detect a difference of this magnitude between the 2 groups  
37  
38 212 (80% power and 0.05 significance level) would require a sample of 13 patients in each group.  
39  
40 213 The cost estimation of CCH was based on standard procedures independent of sample size.  
41  
42 214 For the cost of fasciectomy, a random sample of 15% from 113 fasciectomy-treated patients  
43  
44 215 was judged adequate to provide representative average procedure time estimates and number  
45  
46 216 of visits to medical personnel, on which the total cost was based. Data are shown as mean and  
47  
48 217 SD and/or median and interquartile range (IQR). We calculated the average total cost of  
49  
50 218 treatment per patient when only 1 CCH injection is required. We also calculated the cost if  
51  
52 219 20% of the patients would require 2 CCH injections given on separate sessions to obtain  
53  
54  
55  
56  
57  
58  
59  
60

1  
2  
3 220 contracture reduction. Because some patients who developed skin tears during finger  
4  
5 221 extension chose to have dressing change, when necessary, at home or at primary care, only 1  
6  
7 222 nurse visit was recorded in the Patient Administrative System. We therefore made the  
8  
9 223 calculations assuming 1 of 3 patients in the CCH group would require 1 nurse visit. We also  
10  
11 224 conducted a sensitivity analysis with the conservative assumption of 1 nurse visit per patient.  
12  
13  
14 225 All costs were calculated in Swedish Kronor (SEK) and converted to USD using the rate of 1  
15  
16 226 USD = 6.676 SEK (Sweden's Central Bank average for 2011). The within-group change in  
17  
18 227 extension deficit was analyzed with the Wilcoxon test. We also compared the 2 groups with  
19  
20  
21 228 regard to improvement in total extension deficit using the Mann-Whitney test. A p value  
22  
23 229 below 0.05 was used to indicate statistical significance.  
24  
25  
26  
27  
28  
29  
30  
31  
32  
33  
34  
35  
36  
37  
38  
39  
40  
41  
42  
43  
44  
45  
46  
47  
48  
49  
50  
51  
52  
53  
54  
55  
56  
57  
58  
59  
60

1  
2  
3 230 **RESULTS**  
4

5 231  
6

7 232 The 16 patients in the CCH group and the 16 patients in the fasciectomy group had similar  
8  
9 233 characteristics (Table 1). In the fasciectomy group half of the patients received general  
10  
11 234 anaesthesia and the other half axillary block. The mean operating time was 62 (SD 27)  
12  
13 235 minutes, mean total OR time 138 (SD 43) minutes, and mean postoperative time spent at the  
14  
15 236 day-surgery recovery room until discharge 215 (SD 41) minutes. The median time from  
16  
17 237 surgery to end of therapy was 6.3 weeks (IQR 4.0-11.5) and to the postoperative follow-up by  
18  
19 238 the surgeon 7.5 weeks (IQR 6.0-12.0). None of the patients in the CCH group required further  
20  
21 239 therapy than the standard visits. Of the 16 patients, 9 developed skin tears ranging from minor  
22  
23 240 superficial skin breakage that did not require further wound care to deeper wound that  
24  
25 241 required 1 or more dressing changes. All wounds had healed within 2 weeks after injection.  
26  
27  
28  
29

30 242

31  
32 243 **Costs**  
33

34 244 The cost specifications for the two treatments are shown in Table 2. The largest treatment cost  
35  
36 245 for CCH injections was the cost of the injection itself (970.19 USD) and for fasciectomy the  
37  
38 246 cost of personnel (783.97 USD) and other costs (380.81 USD) associated with the surgery in  
39  
40 247 the operating room. Compared to fasciectomy, treatment with CCH injections required fewer  
41  
42 248 outpatient hospital visits to a nurse and a therapist (Table 3).  
43  
44  
45

46 249

47 250 The total treatment cost with 1 CCH injection was 33% lower than that for fasciectomy  
48  
49 251 (1418.04 versus 2102.56 USD). The cost was still lower (1675.24 USD) if 20% of patients  
50  
51 252 treated with CCH would require 2 injections in the same hand, given in separate sessions. In  
52  
53 253 the sensitivity analysis the cost of CCH injections assuming an average of 1 nurse visit per  
54  
55  
56  
57  
58  
59  
60

1  
2  
3 254 patient was 1472.51 USD when 1 injection is given and 1696.79 USD when 20% would  
4  
5 255 require 2 injections.

6  
7 256

8  
9  
10 257 **Outcomes**

11 258 Of the 16 patients in the CCH and fasciectomy groups, 7 and 9 patients respectively achieved  
12  
13 259 an extension deficit of 0 to 5 degrees in the joint with the largest extension deficit. In both  
14  
15 260 groups the improvement in total extension deficit was statistically significant ( $p < 0.001$ ) and  
16  
17 261 the extension deficits after CCH and fasciectomy were similar (median 10 degrees) (Table 3).  
18  
19 262 The median improvement in total extension deficit in the CCH group was 70 (IQR 55-85)  
20  
21 263 degrees and in the fasciectomy group 50 (IQR 41-60) degrees ( $p=0.006$ ).  
22  
23 264 No complications were observed in any of the groups at the final follow-up.

24  
25  
26  
27  
28  
29  
30  
31  
32  
33  
34  
35  
36  
37  
38  
39  
40  
41  
42  
43  
44  
45  
46  
47  
48  
49  
50  
51  
52  
53  
54  
55  
56  
57  
58  
59  
60

1  
2  
3 265 **DISCUSSION**  
4  
5

6 266

7 267 Our study shows that treatment of DC with collagenase injections is associated with lower  
8  
9 268 costs than surgery (fasciectomy) and results in similar short-term outcomes regarding  
10  
11 269 reduction in finger joint contractures. The costs are still lower when assuming that 20% of the  
12  
13 270 patients would require 2 injections in the same hand, but if more than 5 of 10 patients need 2  
14  
15 271 or more injections the costs would exceed those of fasciectomy. Our estimates of the costs  
16  
17 272 assuming 20% would require 2 injections were based on separate treatment sessions; the costs  
18  
19 273 would be even lower if the 2 injections are given in the same session, which would probably  
20  
21 274 become the usual practice.<sup>12</sup> Further, our results should be considered conservative since we  
22  
23 275 have not considered complications (such as wound infection and chronic regional pain  
24  
25 276 syndrome) that are probably more frequent after surgery than after CCH injections and would  
26  
27 277 therefore add to the total costs.  
28  
29  
30  
31

32 278

33  
34 279 For fasciectomy, the largest cost was represented by the various costs associated with a day-  
35  
36 280 surgery procedure of approximately 1 hour duration in the operating room. The cost would be  
37  
38 281 lower if the average operating time were shorter than our estimate of 62 minutes. In a recent  
39  
40 282 study of DC in 12 European countries (based on a surgeon survey and patient chart review),  
41  
42 283 the mean operating time for fasciectomy across all countries was 67 minutes (Nordic 63,  
43  
44 284 Eastern 69, Western 66, and Mediterranean 68 minutes).<sup>4</sup> A potential advantage with CCH  
45  
46 285 injections is the possibility to treat patients with bilateral disease in 1 stage, which is  
47  
48 286 uncommon with surgery considering the nature of the procedure. In contrast, patients with  
49  
50 287 contractures involving 3 or more fingers can be treated with surgery in one session, but would  
51  
52 288 need at least 2 CCH injections and, in more severe cases, 2 or more treatment sessions.  
53  
54  
55

56 289  
57  
58  
59  
60

290

291 Skin tears ranging from minor superficial skin breakage to deeper wounds occurred in more  
292 than half the patients after CCH injections in our study. Skin tears following CCH injections  
293 were reported in 11% in the multicenter randomized trial,<sup>7</sup> and in up to 19% in other  
294 studies.<sup>13,14</sup> Skin tears are more likely to occur in severe contractures especially of the small  
295 finger.<sup>9</sup> Because the incidence and severity of skin tears (ie, need for wound care) may vary  
296 we calculated the costs assuming that, on average, one third of the patients would require 1  
297 nurse visit and also did a sensitivity analysis assuming an average of 1 nurse visit. We believe  
298 these estimates cover the costs of wound care even if the true incidence of skin tears is higher  
299 than previously reported.

300

301 We only compared direct costs, and therefore did not include costs of lost productivity or sick  
302 leave. Among employed patients, sick leave is more likely to be necessary and longer after  
303 fasciectomy than after CCH injections. According to the Swedish Social Insurance Agency  
304 the total cost of a 1-week sick leave based on the average salary in Sweden 2011 (including  
305 sick-pay, general payroll tax, vacation-pay and overhead costs) exceeds 1300 USD  
306 ([www.scb.se](http://www.scb.se)). In addition, the direct costs of CCH injections and fasciectomy may differ  
307 across countries and settings. In a Canadian study that estimated the cost (during 2005) of  
308 open carpal tunnel release, a 10-minute procedure done under local anaesthesia, the total cost  
309 (excluding surgeon's fee) was 137 CAD when done in the main operating room and 53 CAD  
310 dollars when done in the office.<sup>15</sup>

311

312 A limitation of our study is that only short-term outcomes were measured. The improvement  
313 was high and the minor residual contracture was similar for CCH and fasciectomy.

314 Differences in long-term outcomes may change the cost-effectiveness of these treatments



1  
2  
3 315 because if they differ substantially in the recurrence rate and the need for further treatments  
4  
5 316 the cost of subsequent treatments should also be considered. According to the most recent  
6  
7 317 estimate of recurrence following CCH injections, the rate at 5 years was 35% but in only 7%  
8  
9 318 the recurrence required treatment.<sup>16</sup> Another limitation is that in the fasciectomy group the  
10  
11 319 baseline range-of-motion measurements were done by different surgeons and the follow-up  
12  
13 320 measurements by different therapists. The inter-observer reliability of these measurements is  
14  
15 321 unknown and there might be a risk that the surgeon overestimated the preoperative  
16  
17 322 contracture and the treating therapist underestimated residual contracture. However, we do not  
18  
19 323 believe this issue has a substantial influence because fasciectomy was the only treatment  
20  
21 324 option and the results of the post-treatment measurements, done by therapists, were similar in  
22  
23 325 both groups.  
24  
25  
26  
27  
28

29 327 In conclusion, treatment of DC with CCH injections costs 33% less, in direct costs, than  
30  
31 328 fasciectomy with equivalent short-term efficacy regarding reduction in contracture.  
32  
33  
34  
35  
36  
37  
38  
39  
40  
41  
42  
43  
44  
45  
46  
47  
48  
49  
50  
51  
52  
53  
54  
55  
56  
57  
58  
59  
60

1  
2  
3 330 **Funding**  
4

5 331  
6

7 332 This research was supported by Hässleholm Hospital. The funding source (public hospital)  
8  
9 333 had no role in the conduct of the study, data analysis and interpretation, or decision to submit  
10  
11 334 the article for publication. No commercial entities were involved at any stage.  
12

13  
14 335 **Contributorship Statement**  
15

16 336 ES, AL, IA: Study conception and design, acquisition of data, analysis and interpretation of  
17  
18 337 data, and drafting of the article.  
19

20  
21 338 EA: Acquisition of data, and critical revision of the article for important intellectual content.  
22

23 339 MW: Analysis and interpretation of data and critical revision of the article for important  
24  
25 340 intellectual content.  
26

27 341 All authors approved the final submitted version.  
28

29 342 **Competing Interests**  
30

31 343 Dr. Atroshi was a member of an Expert Group on Dupuytren's disease for Pfizer 2012. The  
32  
33 344 other authors have no competing interests.  
34  
35  
36  
37  
38  
39  
40  
41  
42  
43  
44  
45  
46  
47  
48  
49  
50  
51  
52  
53  
54  
55  
56  
57  
58  
59  
60

## References

1. Desai SS, Hentz VR. The treatment of Dupuytren disease. *J Hand Surg Am* 2011;36:936-942.
2. Statistical Databse. The National Board of health and Welfare 2013. Available at <http://www.socialstyrelsen.se/statistik/statistikdatabas/dagkirurgi>. Accessed 14-09-2013.
3. Skåne County. Annual Report. Skåne County 2010; Available at [http://www.skane.se/upload/Webbplatser/Skaneportalen-extern/OmRegionSkane/ekonomi/arsredovisning/2010/ÅR\\_2010\\_110426.pdf](http://www.skane.se/upload/Webbplatser/Skaneportalen-extern/OmRegionSkane/ekonomi/arsredovisning/2010/ÅR_2010_110426.pdf). Accessed 14-09-2013.
4. Dias J, Bainbridge C, Leclercq C et al. Surgical management of Dupuytren's contracture in Europe: regional analysis of a surgeon survey and patient chart review. *Int J Clin Pract* 2013;67:271-281.
5. Crean SM, Gerber RA, Le Graverand MP, Boyd DM, Cappelleri JC. The efficacy and safety of fasciectomy and fasciotomy for Dupuytren's contracture in European patients: a structured review of published studies. *J Hand Surg Eur Vol* 2011;36:396-407.
6. Hogemann A, Wolfhard U, Kendoff D, Board TN, Olivier LC. Results of total aponeurotomy for Dupuytren's contracture in 61 patients: a retrospective clinical study. *Arch Orthop Trauma Surg* 2009;129:195-201.
7. Hurst LC, Badalamente MA, Hentz VR et al. Injectable collagenase clostridium histolyticum for Dupuytren's contracture. *N Engl J Med* 2009;361:968-979.
8. Chen NC, Shauver MJ, Chung KC. Cost-effectiveness of open partial fasciectomy, needle aponeurotomy, and collagenase injection for dupuytren contracture. *J Hand Surg Am* 2011;36:1826-1834.
9. Herrera FA, Benhaim P, Suliman A, Roostaeian J, Azari K, Mitchell S. Cost comparison of open fasciectomy versus percutaneous needle pponeurotomy for treatment of Dupuytren contracture. *Ann Plast Surg* 2013. Epub ahead of print (PMID: 23486126).
10. Hurst L. Dupuytren's contracture. In: Green's Operative Hand Surgery. 6th Edition ed. Wolfe SW, Hotchkiss RN, Pederson WC, Kozin SH. Elsevier; 2010. Philadelphia, PA. p153-154.
11. van Rijssen AL, ter Linden H, Werker PM. Five-year results of a randomized clinical trial on treatment in Dupuytren's disease: percutaneous needle fasciotomy versus limited fasciectomy. *Plast Reconstr Surg* 2012;129:469-477.
12. Coleman S, Gilpin D, Tursi J, Kaufman G, Jones N, Cohen B. Multiple concurrent collagenase clostridium histolyticum injections to Dupuytren's cords: an exploratory study. *BMC Musculoskelet Disord* 2012;13:61.
13. Skirven TM, Bachoura A, Jacoby SM, Culp RW, Osterman AL. The effect of a therapy protocol for increasing correction of severely contracted proximal interphalangeal joints

1  
2  
3  
4  
5  
6  
7  
8  
9  
10  
11  
12  
13  
14  
15  
16  
17  
18  
19  
20  
21  
22  
23  
24  
25  
26  
27  
28  
29  
30  
31  
32  
33  
34  
35  
36  
37  
38  
39  
40  
41  
42  
43  
44  
45  
46  
47  
48  
49  
50  
51  
52  
53  
54  
55  
56  
57  
58  
59  
60

- 384 caused by Dupuytren disease and treated with collagenase injection. *J Hand Surg Am*  
385 2013;38:684-689.
- 386 14. Manning CJ, Delaney R, Hayton MJ. Efficacy and tolerability of Day 2 manipulation  
387 and local anaesthesia after collagenase injection in patients with Dupuytren's  
388 contracture. *J Hand Surg Eur Vol.* 2013. Epub ahead of print (PMID:23719171).
- 389 15. Leblanc MR, Lalonde J, Lalonde DH. A detailed cost and efficiency analysis of  
390 performing carpal tunnel surgery in the main operating room versus the ambulatory  
391 setting in Canada. *Hand (N Y)* 2007;2:173-178.
- 392 16. Peimer CA, Blazar P, Coleman S et al. Dupuytren contracture recurrence following  
393 treatment with collagenase clostridium histolyticum (CORDLESS study): 3-year data. *J*  
394 *Hand Surg Am* 2013;38:12-22.  
395  
396  
397

398 **Table 1.** Characteristics of the two samples of patients with Dupuytren's contracture treated  
 399 with collagenase clostridium histolyticum injection or surgery (fasciectomy)

|                                                | CCH injection | Fasciectomy |
|------------------------------------------------|---------------|-------------|
| Number of patients (men)                       | 16 (11)       | 16 (13)     |
| Age (yrs), mean (SD)                           | 69 (4)        | 71 (5)      |
| Number of fingers treated*                     |               |             |
| Small                                          | 11            | 9           |
| Ring                                           | 7             | 8           |
| Middle                                         | 0             | 1           |
| Total extension deficit (degrees) <sup>†</sup> |               |             |
| mean (SD)                                      | 90 (39)       | 71 (28)     |
| median (IQR)                                   | 70 (60-115)   | 75 (45-89)  |

400  
 401 CCH, collagenase clostridium histolyticum; IQR, interquartile range

402 \*2 patients in each group had 2 fingers treated.

403 <sup>†</sup> Metacarpophalangeal (MCP) plus proximal interphalangeal (PIP) joints (no MCP contracture  
 404 in 1 patient in the CCH group and 2 patients in the fasciectomy group and no PIP contracture  
 405 in 7 patients and 4 patients, respectively). In patients with 2 fingers treated the largest  
 406 extension deficit was used.

407 **Table 2.** Cost specification for the various stages of treating Dupuytren's contracture  
 408 with collagenase clostridium histolyticum injection or surgery (fasciectomy)

|                                                     | Personnel costs <sup>*</sup> | Other costs <sup>†</sup> |
|-----------------------------------------------------|------------------------------|--------------------------|
|                                                     | (USD)                        | (USD)                    |
| Doctor visit, CCH or fasciectomy (doctor and nurse) | 65.80                        | 16.78                    |
| Injection, CCH (doctor and nurse)                   | 70.63                        | 991.16                   |
| Finger extension, CCH (doctor and nurse)            | 70.63                        | 20.97                    |
| Therapist visit, CCH                                | 26.58                        | 25.16                    |
| Surgery, fasciectomy (doctors and others)           | 783.97                       | 380.81                   |
| Day surgery care, fasciectomy                       | 88.10                        | 52.41                    |
| Therapist visit, fasciectomy                        | 39.88                        | 37.77                    |
| Nurse visit, CCH or fasciectomy                     | 43.51                        | 37.77                    |

409

410 CCH, collagenase clostridium histolyticum; USD, United States dollars

411 \* Include average salary, social security contributions, vacation pay, sick pay, overhead costs,  
 412 and the degree of capacity utilization.

413 † Include costs of surgical and other materials, injections, premises, etc.

414 Price of 1 CCH injection = 970.19 USD.

1  
2  
3 415 **Table 3.** Number of visits to medical personnel, actual costs and outcomes of treating  
4  
5 416 Dupuytren's contracture with collagenase clostridium histolyticum injection or surgery  
6  
7 417 (fasciectomy)  
8  
9

10 418

|                                                               | CCH injection | Fasciectomy        |
|---------------------------------------------------------------|---------------|--------------------|
| Mean, median (IQR) number of visits to:                       |               |                    |
| Doctor                                                        | 3*            | 2*                 |
| Nurse                                                         | 0.33*         | 3.0, 3.0 (2.0-3.8) |
| Therapist                                                     | 3*            | 5.1, 4.0 (3.0-6.8) |
| Total cost per patient (USD)                                  | 1418.04       | 2102.56            |
| Total cost per patient when<br>20% require 2 injections (USD) | 1675.24       | 2102.56            |
| Total extension deficit (degrees) <sup>†</sup>                |               |                    |
| mean (SD)                                                     | 20 (25)       | 19 (19)            |
| median (IQR)                                                  | 10 (0-30)     | 10 (0-34)          |

38 419

39 420 CCH, collagenase clostridium histolyticum; IQR, inter-quartile range; USD, United States

41 421 dollars

42 422 \* Number of visits to a doctor in both groups and to a therapist in the CCH group was similar  
43  
44 423 for all patients (Figure 1); a third of CCH patients assumed to require 1 visit to a nurse.  
45  
46  
47

48 424 <sup>†</sup>Metacarpophalangeal plus proximal interphalangeal joints  
49  
50

51 425

52 426

53 427  
54  
55  
56  
57  
58  
59  
60

1  
2  
3 428 **Figure legend**

4  
5 429

6  
7 430 **Figure 1.** Diagram showing the various stages of treating patients with Dupuytren's

8  
9 431 contracture with collagenase clostridium histolyticum (CCH) injection or with fasciectomy as

10  
11 432 a day-surgery procedure performed in the operating room (OR). The number of visits is 1

12  
13 433 unless specified otherwise.  
14  
15  
16  
17  
18  
19  
20  
21  
22  
23  
24  
25  
26  
27  
28  
29  
30  
31  
32  
33  
34  
35  
36  
37  
38  
39  
40  
41  
42  
43  
44  
45  
46  
47  
48  
49  
50  
51  
52  
53  
54  
55  
56  
57  
58  
59  
60



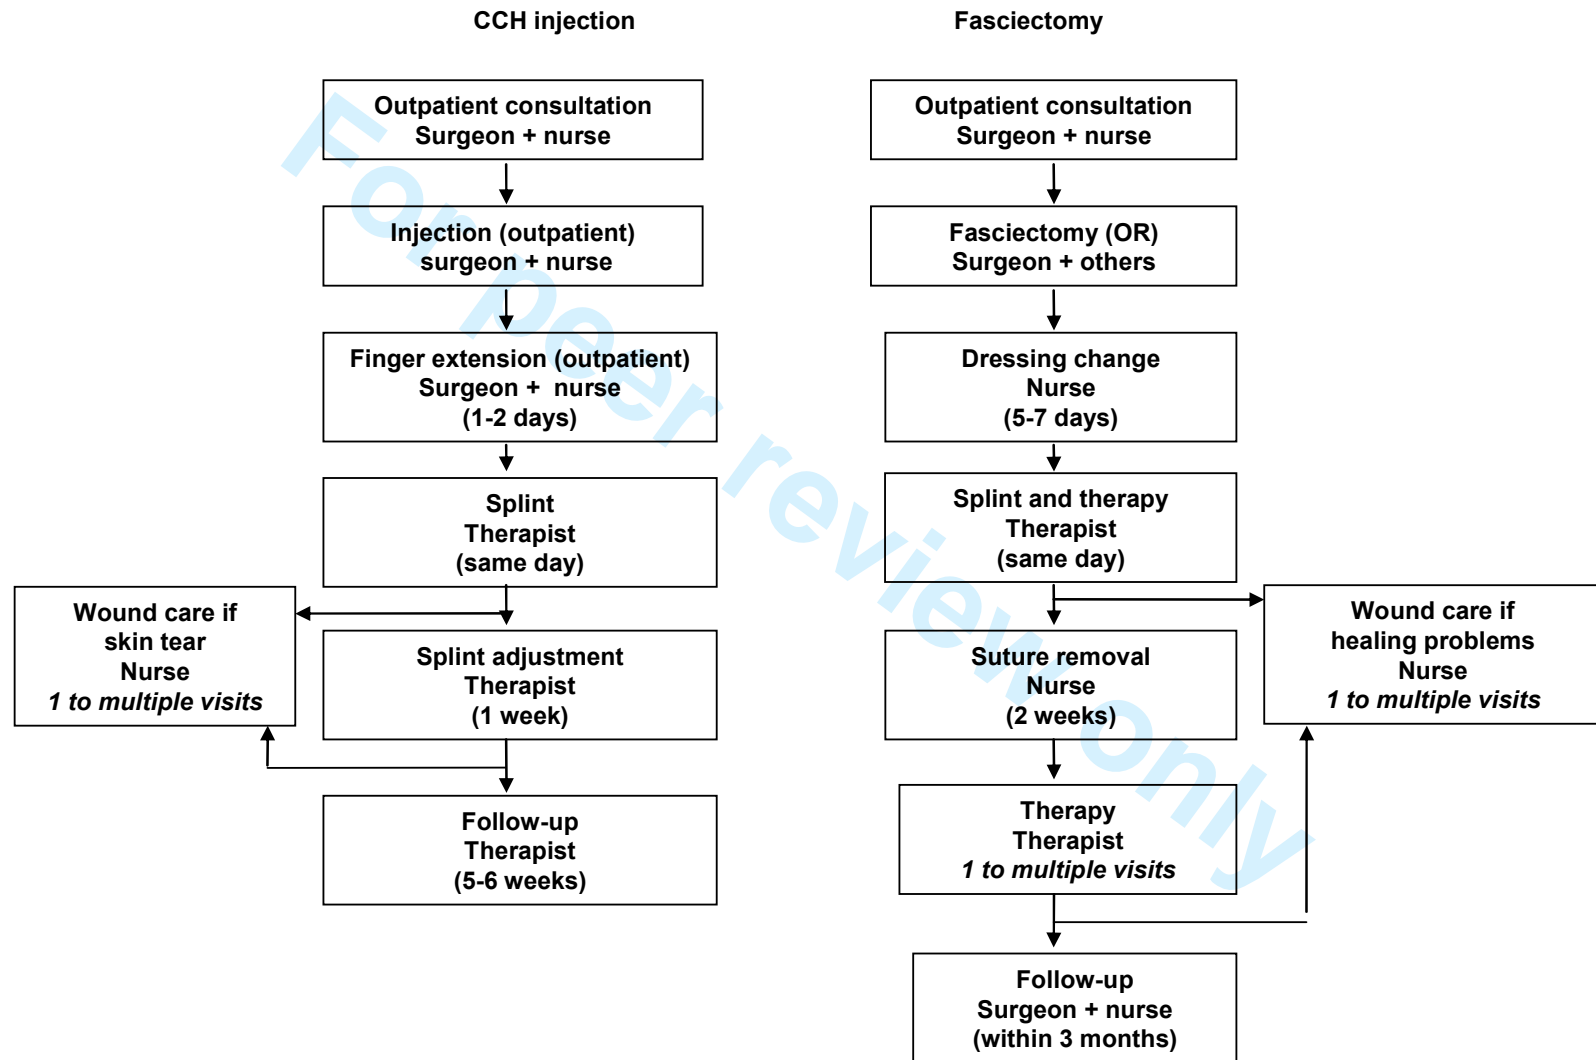

## STROBE Statement—checklist of items that should be included in reports of observational studies

|                                               | Item No | Recommendation                                                                                                                                                                                                                                                                                                                                                                                                                                                                                                                                                                                                                                                                                   |
|-----------------------------------------------|---------|--------------------------------------------------------------------------------------------------------------------------------------------------------------------------------------------------------------------------------------------------------------------------------------------------------------------------------------------------------------------------------------------------------------------------------------------------------------------------------------------------------------------------------------------------------------------------------------------------------------------------------------------------------------------------------------------------|
| <b>Title and abstract</b><br><b>P 1+2</b>     | 1       | (a) Indicate the study's design with a commonly used term in the title or the abstract<br>(b) Provide in the abstract an informative and balanced summary of what was done and what was found                                                                                                                                                                                                                                                                                                                                                                                                                                                                                                    |
| <b>Introduction</b>                           |         |                                                                                                                                                                                                                                                                                                                                                                                                                                                                                                                                                                                                                                                                                                  |
| Background/rationale<br><b>P 4-5</b>          | 2       | Explain the scientific background and rationale for the investigation being reported                                                                                                                                                                                                                                                                                                                                                                                                                                                                                                                                                                                                             |
| Objectives<br><b>P 5</b>                      | 3       | State specific objectives, including any prespecified hypotheses                                                                                                                                                                                                                                                                                                                                                                                                                                                                                                                                                                                                                                 |
| <b>Methods</b>                                |         |                                                                                                                                                                                                                                                                                                                                                                                                                                                                                                                                                                                                                                                                                                  |
| Study design<br><b>P 6</b>                    | 4       | Present key elements of study design early in the paper                                                                                                                                                                                                                                                                                                                                                                                                                                                                                                                                                                                                                                          |
| Setting<br><b>P 6</b>                         | 5       | Describe the setting, locations, and relevant dates, including periods of recruitment, exposure, follow-up, and data collection                                                                                                                                                                                                                                                                                                                                                                                                                                                                                                                                                                  |
| Participants<br><b>P 6</b>                    | 6       | (a) <i>Cohort study</i> —Give the eligibility criteria, and the sources and methods of selection of participants. Describe methods of follow-up<br><i>Case-control study</i> —Give the eligibility criteria, and the sources and methods of case ascertainment and control selection. Give the rationale for the choice of cases and controls<br><i>Cross-sectional study</i> —Give the eligibility criteria, and the sources and methods of selection of participants<br>(b) <i>Cohort study</i> —For matched studies, give matching criteria and number of exposed and unexposed<br><i>Case-control study</i> —For matched studies, give matching criteria and the number of controls per case |
| Variables<br><b>P 8-10</b>                    | 7       | Clearly define all outcomes, exposures, predictors, potential confounders, and effect modifiers. Give diagnostic criteria, if applicable                                                                                                                                                                                                                                                                                                                                                                                                                                                                                                                                                         |
| Data sources/<br>measurement<br><b>P 7-10</b> | 8*      | For each variable of interest, give sources of data and details of methods of assessment (measurement). Describe comparability of assessment methods if there is more than one group                                                                                                                                                                                                                                                                                                                                                                                                                                                                                                             |
| Bias<br><b>P 10-11</b>                        | 9       | Describe any efforts to address potential sources of bias                                                                                                                                                                                                                                                                                                                                                                                                                                                                                                                                                                                                                                        |
| Study size<br><b>P 10</b>                     | 10      | Explain how the study size was arrived at                                                                                                                                                                                                                                                                                                                                                                                                                                                                                                                                                                                                                                                        |
| Quantitative variables<br><b>P 10-11</b>      | 11      | Explain how quantitative variables were handled in the analyses. If applicable, describe which groupings were chosen and why                                                                                                                                                                                                                                                                                                                                                                                                                                                                                                                                                                     |
| Statistical methods<br><b>P 10-11</b>         | 12      | (a) Describe all statistical methods, including those used to control for confounding<br>(b) Describe any methods used to examine subgroups and interactions<br>(c) Explain how missing data were addressed<br>(d) <i>Cohort study</i> —If applicable, explain how loss to follow-up was addressed<br><i>Case-control study</i> —If applicable, explain how matching of cases and controls was addressed<br><i>Cross-sectional study</i> —If applicable, describe analytical methods taking account of sampling strategy<br>(e) Describe any sensitivity analyses                                                                                                                                |

Continued on next page

**Results**

|                  |     |                                                                                                                                                                                                                                                          |
|------------------|-----|----------------------------------------------------------------------------------------------------------------------------------------------------------------------------------------------------------------------------------------------------------|
| Participants     | 13* | (a) Report numbers of individuals at each stage of study—eg numbers potentially eligible, examined for eligibility, confirmed eligible, included in the study, completing follow-up, and analysed<br><b>P 12</b><br><b>Figure 1</b>                      |
|                  |     | (b) Give reasons for non-participation at each stage                                                                                                                                                                                                     |
|                  |     | (c) Consider use of a flow diagram                                                                                                                                                                                                                       |
| Descriptive data | 14* | (a) Give characteristics of study participants (eg demographic, clinical, social) and information on exposures and potential confounders<br><b>P 12, Table 1</b>                                                                                         |
|                  |     | (b) Indicate number of participants with missing data for each variable of interest                                                                                                                                                                      |
|                  |     | (c) <i>Cohort study</i> —Summarise follow-up time (eg, average and total amount)                                                                                                                                                                         |
| Outcome data     | 15* | <i>Cohort study</i> —Report numbers of outcome events or summary measures over time<br><b>P 12-13</b><br><b>Table 2 &amp; 3</b>                                                                                                                          |
|                  |     | <i>Case-control study</i> —Report numbers in each exposure category, or summary measures of exposure                                                                                                                                                     |
|                  |     | <i>Cross-sectional study</i> —Report numbers of outcome events or summary measures                                                                                                                                                                       |
| Main results     | 16  | (a) Give unadjusted estimates and, if applicable, confounder-adjusted estimates and their precision (eg, 95% confidence interval). Make clear which confounders were adjusted for and why they were included<br><b>P 12-13</b><br><b>Table 2 &amp; 3</b> |
|                  |     | (b) Report category boundaries when continuous variables were categorized                                                                                                                                                                                |
|                  |     | (c) If relevant, consider translating estimates of relative risk into absolute risk for a meaningful time period                                                                                                                                         |
| Other analyses   | 17  | Report other analyses done—eg analyses of subgroups and interactions, and sensitivity analyses<br><b>P 12-13</b>                                                                                                                                         |

**Discussion**

|                  |    |                                                                                                                                                                                              |
|------------------|----|----------------------------------------------------------------------------------------------------------------------------------------------------------------------------------------------|
| Key results      | 18 | Summarise key results with reference to study objectives<br><b>P 14</b>                                                                                                                      |
| Limitations      | 19 | Discuss limitations of the study, taking into account sources of potential bias or imprecision. Discuss both direction and magnitude of any potential bias<br><b>P 15-16</b>                 |
| Interpretation   | 20 | Give a cautious overall interpretation of results considering objectives, limitations, multiplicity of analyses, results from similar studies, and other relevant evidence<br><b>P 15-16</b> |
| Generalisability | 21 | Discuss the generalisability (external validity) of the study results<br><b>P 15</b>                                                                                                         |

**Other information**

|         |    |                                                                                                                                                                              |
|---------|----|------------------------------------------------------------------------------------------------------------------------------------------------------------------------------|
| Funding | 22 | Give the source of funding and the role of the funders for the present study and, if applicable, for the original study on which the present article is based<br><b>P 17</b> |
|---------|----|------------------------------------------------------------------------------------------------------------------------------------------------------------------------------|

\*Give information separately for cases and controls in case-control studies and, if applicable, for exposed and unexposed groups in cohort and cross-sectional studies.

**Note:** An Explanation and Elaboration article discusses each checklist item and gives methodological background and published examples of transparent reporting. The STROBE checklist is best used in conjunction with this article (freely available on the Web sites of PLoS Medicine at <http://www.plosmedicine.org/>, Annals of Internal Medicine at <http://www.annals.org/>, and Epidemiology at <http://www.epidem.com/>). Information on the STROBE Initiative is available at [www.strobe-statement.org](http://www.strobe-statement.org).



**Costs of collagenase injections compared with fasciectomy  
in the treatment of Dupuytren's contracture: A retrospective  
cohort study**

|                                 |                                                                                                                                                                                                                                                                                                                                                                                               |
|---------------------------------|-----------------------------------------------------------------------------------------------------------------------------------------------------------------------------------------------------------------------------------------------------------------------------------------------------------------------------------------------------------------------------------------------|
| Journal:                        | <i>BMJ Open</i>                                                                                                                                                                                                                                                                                                                                                                               |
| Manuscript ID:                  | bmjopen-2013-004166.R1                                                                                                                                                                                                                                                                                                                                                                        |
| Article Type:                   | Research                                                                                                                                                                                                                                                                                                                                                                                      |
| Date Submitted by the Author:   | 05-Dec-2013                                                                                                                                                                                                                                                                                                                                                                                   |
| Complete List of Authors:       | Atroshi, Isam; Clinical Sciences, Lund University, Department of Orthopedics Hässeholm-Kristianstad<br>Strandberg, Emelie; Hässeholm Hospital, Department of Orthopedics<br>Lauritzson, Anna; Hässeholm Hospital, Department of Orthopedics<br>Ahlgren, Eva; Hässeholm Hospital, Department of Orthopedics<br>Waldén, Markus; Linköping University, Department of Medical and Health Sciences |
| <b>Primary Subject Heading</b>: | Health economics                                                                                                                                                                                                                                                                                                                                                                              |
| Secondary Subject Heading:      | Surgery                                                                                                                                                                                                                                                                                                                                                                                       |
| Keywords:                       | Hand & wrist < ORTHOPAEDIC & TRAUMA SURGERY, Musculoskeletal disorders < ORTHOPAEDIC & TRAUMA SURGERY, Orthopaedic & trauma surgery < SURGERY                                                                                                                                                                                                                                                 |
|                                 |                                                                                                                                                                                                                                                                                                                                                                                               |

SCHOLARONE™  
Manuscripts

only

1  
2  
3 1 **Costs for collagenase injections compared with fasciectomy in the treatment**  
4  
5  
6 2 **of Dupuytren's contracture: A retrospective cohort study**  
7

8  
9  
10 3  
11 4  
12 5 Isam Atroshi, MD, PhD<sup>1,2</sup> Emelie Strandberg, MS (Econ),<sup>1</sup> Anna Lauritzson, OT,<sup>1</sup>

13  
14 6 Eva Ahlgren, RN,<sup>1</sup> Markus Waldén, MD, PhD,<sup>1,3</sup>  
15  
16  
17 7

18  
19 8  
20  
21 9 <sup>1</sup>Department of Orthopedics Hässleholm-Kristianstad, Hässleholm Hospital, Hässleholm,  
22  
23 Sweden  
24

25  
26 11 <sup>2</sup>Department of Clinical Sciences, Lund University, Lund, Sweden  
27

28 12 <sup>3</sup>Department of Medical and Health Sciences, Linköping University, Linköping, Sweden  
29  
30  
31 13

32 14 Correspondence:

33  
34 15 Isam Atroshi, Department of Orthopedics, Hässleholm Hospital, SE28125 Hässleholm,

35  
36  
37 16 Sweden. Tel: +46443091279, E-mail: [Isam.Atroshi@skane.se](mailto:Isam.Atroshi@skane.se)  
38  
39 17

40  
41 18 Word count: 3692  
42  
43  
44  
45  
46  
47  
48  
49  
50  
51  
52  
53  
54  
55  
56  
57  
58  
59  
60

1  
2  
3 19 **Abstract**

4  
5 20 **Objectives:** To compare collagenase injections and surgery (fasciectomy) for Dupuytren's  
6  
7 21 contracture (DC) regarding actual total direct treatment costs and short-term outcomes.

8  
9 22 **Design:** Retrospective cohort study

10  
11 23 **Setting:** Orthopaedic department of a regional hospital in Sweden.

12  
13 24 **Participants:** Patients aged 65 years or older with previously untreated DC of 30 degrees or  
14  
15 25 greater in the metacarpophalangeal (MCP) and/or proximal interphalangeal (PIP) joints of the  
16  
17 26 small, ring or middle finger. The collagenase group comprised 16 consecutive patients treated  
18  
19 27 during the first 6 months following the introduction of collagenase as treatment for DC at the  
20  
21 28 study centre. The controls were 16 patients randomly selected among those operated on with  
22  
23 29 fasciectomy at the same centre during the preceding 3 years.

24  
25 30 **Interventions:** Treatment with collagenase was given during two standard outpatient clinic  
26  
27 31 visits (injection of 0.9 mg, distributed at multiple sites in a palpable cord, and next-day finger  
28  
29 32 extension under local anaesthesia) followed by night-time splinting. Fasciectomy was done in  
30  
31 33 the operating room (day surgery) under general or regional anaesthesia using standard  
32  
33 34 technique, followed by therapy and splinting.

34  
35 35 **Primary and secondary outcome measures:** Actual total direct costs (salaries of all medical  
36  
37 36 personnel involved in care, medications, materials and other relevant costs), and total MCP  
38  
39 37 and PIP extension deficit (degrees) measured by hand therapists at 6-12 weeks after treatment.

40  
41 38 **Results:** Collagenase injection required fewer hospital outpatient visits to a therapist and  
42  
43 39 nurse than fasciectomy. Total treatment cost for collagenase injection was 1418.04 USD and  
44  
45 40 for fasciectomy 2102.56 USD. The post-treatment median (interquartile range) total extension  
46  
47 41 deficit was 10 (0-30) for the collagenase group and 10 (0-34) for the fasciectomy group.

48  
49 42 **Conclusions:** Treatment of Dupuytren's contracture with one collagenase injection costs 33%  
50  
51 43 less than fasciectomy with equivalent efficacy at 6 weeks regarding reduction in contracture.  
52  
53  
54  
55  
56  
57  
58  
59  
60

1  
2  
3 44 **Strengths and limitations of this study**  
4  
5

6 45

7 46 • This study presents previously unknown estimates of the actual costs of treating  
8

9 Dupuytren's contracture with Collagenase injections or fasciectomy  
10

11 48 • Comparison of the actual costs of the two treatments are based on detailed definition and  
12

13 49 measurement of all relevant costs  
14

15 50 • Outcomes of injections were prospectively measured but outcomes of surgery were based  
16

17 51 on medical records  
18

19 52 • Costs may vary across countries  
20

21 53 • Only short-term outcomes (6 weeks) were compared  
22  
23  
24  
25  
26  
27  
28  
29  
30  
31  
32  
33  
34  
35  
36  
37  
38  
39  
40  
41  
42  
43  
44  
45  
46  
47  
48  
49  
50  
51  
52  
53  
54  
55  
56  
57  
58  
59  
60

## 54 INTRODUCTION

55

56 Dupuytren's contracture (DC) is a common hand disorder causing finger contractures that  
57 may compromise hand function. Surgery in the form of limited fasciectomy has been the main  
58 treatment option for reducing the contracture.<sup>1</sup> In Sweden (population 9.5 millions), more  
59 than 3000 fasciectomy procedures are performed annually;<sup>2</sup> the actual number is probably  
60 higher because procedures performed by surgeons in private practice, although constituting a  
61 small proportion,<sup>3</sup> may not always be reported to the national database. Surgery is usually  
62 done in the main operating room under general or regional anaesthesia and the operating time  
63 is on average about 1 hour,<sup>4</sup> but can be substantially longer when severe contractures are  
64 present in multiple fingers. After surgery many patients require therapy and splints. Although  
65 surgery is often effective in reducing the contracture, postoperative complications such as  
66 nerve injury and wound healing problems are common and patients may develop contracture  
67 recurrence.<sup>5,6</sup>

68

69 Recently, injection with collagenase clostridium histolyticum (CCH) has been introduced as  
70 the first pharmacological treatment for DC after it was shown in a randomized controlled trial  
71 to be more effective than placebo injections in reducing contractures.<sup>7</sup> The treatment is a  
72 relatively simple procedure given in the outpatient clinic and rarely requires prolonged  
73 therapy. The current price of a CCH injection (in Sweden) is almost one thousand US dollars  
74 (USD) and one injection is used for each finger involved (unless contractures in 2 fingers are  
75 caused by a common cord). Because of economic pressure to control health care expenditures,  
76 the cost-effectiveness of surgical procedures has gained increased significance in hospital  
77 decision making. The cost analysis of different treatment procedures such as fasciectomy and



1  
2  
3 78 injection is therefore essential and the differences in short-term costs associated with these  
4  
5 79 two techniques are important to consider.  
6  
7  
8

9  
10 81 To our knowledge no previous study has compared the actual costs of CCH injections with  
11  
12 82 those of fasciectomy. One study based on a cost-utility analysis model concluded that open  
13  
14 83 partial fasciectomy did not meet the cost-effectiveness threshold and that CCH injections  
15  
16 84 would be cost-effective when priced below 945 USD.<sup>8</sup> Studies concerning costs of surgery  
17  
18 85 have usually used reimbursement as a measure of costs,<sup>9</sup> but reimbursement does not  
19  
20 86 necessarily reflect the actual cost of a procedure. Reimbursement levels for a certain  
21  
22 87 procedure may vary substantially across and even within countries. For cost comparison of  
23  
24 88 CCH injections and fasciectomy in DC the actual cost of each procedure is therefore a more  
25  
26 89 relevant measure. When comparing the costs of two treatment methods, the outcome of the  
27  
28 90 treatments must also be taken into consideration. However, we could not find studies that  
29  
30 91 have compared the outcomes of CCH and fasciectomy.  
31  
32  
33

34 92  
35  
36 93 The main aim of this retrospective cohort study was to compare CCH injections with  
37  
38 94 fasciectomy regarding the actual total direct treatment costs. The secondary aim was to  
39  
40 95 compare the short-term outcomes of these two treatment methods.  
41  
42  
43  
44  
45  
46  
47  
48  
49  
50  
51  
52  
53  
54  
55  
56  
57  
58  
59  
60

1  
2  
3 97 **PATIENTS AND METHODS**  
4

5 98

7 99 **Study participants**

10 100 We conducted a retrospective cohort study at one orthopaedic department (Hässleholm,  
11 101 Kristianstad and Ystad Hospitals) in southern Sweden. The department is the only centre that  
12 102 treats patients with DC in a region with approximately 300,000 inhabitants.  
13  
14  
15  
16

17 103

18 104 Data on CCH injections were collected prospectively starting September 2011 when CCH  
19 105 was introduced as the main treatment option for DC at the department. The indication for  
20 106 treatment with CCH injections was identical to that previously used for surgery at the study  
21 107 centre, namely a palpable cord and contracture of 30 degrees or greater in the  
22 108 metacarpophalangeal (MCP) and/or proximal interphalangeal (PIP) joints. For this study we  
23 109 included the first 16 consecutive patients, aged 65 years or older, treated with CCH injections  
24 110 during the first 6 months (September 2011 through February 2012). We restricted the study to  
25 111 patients of non-working age because we aimed to compare only direct costs.  
26  
27  
28  
29  
30  
31  
32  
33  
34  
35  
36  
37  
38

39 112

40 113 Data on fasciectomy were extracted from the medical records of patients treated at the  
41 114 department before the introduction of CCH injections. The patients were chosen among those  
42 115 aged 65 years or older, operated on with fasciectomy January 2009 through June 2011.

43 116 Patients with surgery on more than 2 fingers, previous surgery for DC in the same hand, and  
44 117 additional procedures performed (e.g. skin graft or amputation) were excluded. A total of 113  
45 118 patients were potentially eligible. Of these, a random sample of 15% was chosen by computer  
46 119 (statistical software), yielding 18 patients; 2 were excluded (1 had surgery for DC in the  
47 120 thumb and 1 chose to have postoperative therapy at another location). Thus, the fasciectomy  
48 121 group included 16 patients.  
49  
50  
51  
52  
53  
54  
55  
56  
57  
58  
59  
60

1  
2  
3 122 **Treatment and follow-up procedures**  
4

5 123 Both treatments required an initial standard outpatient consultation visit to a hand surgeon or  
6  
7 124 an orthopaedic surgeon, usually as a referral from the patient's general practitioner. Each  
8  
9 125 surgeon was assisted by a nurse at the outpatient clinic. During the visit the treatment decision  
10  
11 126 was made and the patient was scheduled for treatment (Fig 1).  
12  
13

14  
15  
16 128 **Collagenase injection:** Treatment with CCH required two standard outpatient visits to a hand  
17  
18 129 surgeon: injection and next-day finger extension.<sup>7</sup> During these visits the surgeon was assisted  
19  
20 130 by a nurse (all treatments were given by the same hand surgeon). A modified injection  
21  
22 131 method was used for all treated fingers; after reconstituting CCH with 0.39 ml of diluent,  
23  
24 132 according to the standard procedure, all the reconstituted CCH (0.9 mg) was injected into the  
25  
26 133 cord, distributed at multiple sites. The following day, finger manipulation (extension) was  
27  
28 134 done under local anaesthesia. Immediately after finger extension the patient went to the  
29  
30 135 therapist and received a splint for use at night for 8 weeks. A second visit to the therapist was  
31  
32 136 done 1 week post-injection for splint adjustment and therapy instructions. Patients who during  
33  
34 137 finger extension developed a skin tear that was judged to require dressing change were asked  
35  
36 138 to visit a nurse within 2 to 3 days. Further visits to the nurse were done when necessary,  
37  
38 139 depending on wound status. No routine post-treatment visits were scheduled to the treating  
39  
40 140 surgeon and the final follow-up (usually at 5-6 weeks) was done by the therapist. If the patient  
41  
42 141 was not satisfied with the degree of correction after the first injection, the therapist arranged a  
43  
44 142 consultation to the treating surgeon for consideration of further treatment.  
45  
46  
47  
48  
49

50  
51  
52 144 **Fasciectomy:** Fasciectomy was done as a day-surgery procedure in the main operating room  
53  
54 145 (OR). The surgery was done by one of six different surgeons (three experienced hand  
55  
56 146 surgeons and three orthopaedic surgeons with experience in hand surgery) using standard  
57  
58  
59  
60

1  
2  
3 147 technique for limited open fasciectomy.<sup>10</sup> General anaesthesia or axillary block was used.  
4  
5 148 According to routine procedures at the hospital general anaesthesia was administered by a  
6  
7 149 nurse anaesthetist and axillary block was administered by an anaesthesiologist, after which  
8  
9 150 the nurse anaesthetist was in charge of the patient's care with anaesthesiologist help obtained  
10  
11 151 when needed. The surgery was done by a surgeon (no assistant) with a team consisting of an  
12  
13 152 OR nurse, a nurse anaesthetist and 2 nurse assistants (1 participated only in the initial  
14  
15 153 preparations). The electronic records for each surgical procedure include the exact start and  
16  
17 154 finish times for the preparations before surgery, anaesthesia, the actual surgery (i.e. operating  
18  
19 155 time from incision to dressing), and the work done after the surgeon has completed the  
20  
21 156 operation and until the patient is taken back to the recovery room. After returning from the  
22  
23 157 OR the patient stayed in the recovery room until discharge from the day-surgery unit. The  
24  
25 158 time of discharge is documented in the electronic records. Thus, for each patient 3 times were  
26  
27 159 recorded; the operating time, the total OR time (from start of preparations until room ready  
28  
29 160 for next procedure), and the time at the recovery room until discharge.  
30  
31  
32  
33

34 161  
35  
36 162 After fasciectomy all patients visited a nurse for dressing change after 5 to 7 days, followed  
37  
38 163 immediately by a visit to a therapist for a splint and therapy instructions. A second visit to the  
39  
40 164 nurse for wound inspection and suture removal was done at approximately 2 weeks. Further  
41  
42 165 visits to the nurse were done when necessary, depending on wound status. Patients also had  
43  
44 166 further visits to the therapist for scar management, splint adjustments and therapy instructions  
45  
46 167 as required. The treating therapist decided on the frequency and duration of therapy. Patients  
47  
48 168 had 1 postoperative follow-up visit to the surgeon timed according to surgeon preference.  
49  
50  
51  
52

53 169  
54 170  
55  
56 171  
57  
58  
59  
60

1  
2  
3 172 **Cost measurement**  
4

5 173 A detailed analysis of the salaries of physicians and non-physician medical personnel  
6  
7 174 involved in the treatment of patients with DC was performed for CCH injection and  
8  
9 175 fasciectomy. We identified the average salaries of individuals and used the average time units  
10  
11 176 to calculate the cost of manpower. The costs of all materials, premises and other costs were  
12  
13 177 calculated. We included fixed assets such as the costs of the premises and its expenses and the  
14  
15 178 costs of surgical equipment. All costs were measured based on 2011 salaries/prices. These  
16  
17 179 costs include; salaries of all medical personnel involved in the direct care of the patients  
18  
19 180 including social security contributions, vacation pay and sick pay (averaged for each category:  
20  
21 181 specialist orthopaedic surgeon, anaesthesiologist, nurse, nurse assistant and therapist),  
22  
23 182 hospital overhead costs, the degree of capacity utilization, medications, surgical and other  
24  
25 183 material, premises and other costs. The average salaries were based on all respective medical  
26  
27 184 personnel group in the public health care sector in the region. We did not include costs of  
28  
29 185 non-medical personnel involved in the care (such as receptionists, secretaries, cleaners, etc).  
30  
31  
32  
33

34 186  
35  
36 187 A standard outpatient visit to a doctor was 20 minutes. For the 2 CCH visits (injection and  
37  
38 188 finger extension) we used the standard time for the surgeon and 25 minutes for the assisting  
39  
40 189 nurse (to account for the time needed for preparations and work after the session had ended).  
41  
42 190 For fasciectomy we used the mean operating time, total OR time and recovery time, according  
43  
44 191 to the personnel involved and adjusted as required. For the operating surgeon we used the  
45  
46 192 mean operating time plus 25 minutes needed for additional work (assessing the patient and  
47  
48 193 marking the surgical site before surgery, scrubbing, writing the surgical notes and discharging  
49  
50 194 the patient after surgery). For the non-physician personnel we used the mean total operating  
51  
52 195 room time and for the anaesthesiologist we used half that time (one anaesthesiologist is  
53  
54 196 usually assigned to 2 operating rooms simultaneously and the care of these patients after  
55  
56  
57  
58  
59  
60

1  
2  
3 197 surgery). For recovery room personnel (a nurse and a nurse assistant are in charge of up to 5  
4  
5 198 patients simultaneously), we used a fifth of the recovery time plus 5 minutes (preoperative  
6  
7 199 preparations). A standard outpatient visit to a nurse (for wound care after CCH injection or  
8  
9 200 fasciectomy) was 45 minutes. A standard visit to therapist after CCH injection was 30  
10  
11 201 minutes and after fasciectomy 45 minutes. For each patient the exact number of hospital  
12  
13 202 outpatient visits to a doctor, nurse or therapist, related to the treatments, was retrieved from  
14  
15 203 the Patient Administrative System.  
16  
17  
18  
19  
20

### 205 **Outcome measurement**

206 At baseline and at all follow-up visits range of motion including extension and flexion of the  
207 MCP and PIP joints of the fingers was measured with a goniometer. In the fasciectomy group  
208 the baseline measurements were done by the surgeons during the visit that resulted in the  
209 patient being scheduled for fasciectomy and the post-treatment measurements were done by  
210 six different therapists; these measurements were recorded in the patient's electronic medical  
211 records. In the CCH group all measurements (immediately before injection and at follow-up)  
212 were done by the same therapist, as part of a research project. The measurements recorded at  
213 baseline and at the final visit were used in the analysis.  
214

### 215 **Analysis**

216 In 2 previous randomized trials the proportion of MCP joints that were reduced to 0 to 5  
217 degrees of extension deficit was 45% at 30 days after first CCH injection<sup>7</sup> and 94% at 6  
218 weeks after fasciectomy.<sup>11</sup> To detect a difference of this magnitude between the 2 groups  
219 (80% power and 0.05 significance level) would require a sample of 13 patients in each group.  
220 The cost estimation of CCH was based on standard procedures independent of sample size.  
221 For the cost of fasciectomy, a random sample of 15% from 113 fasciectomy-treated patients

1  
2  
3 222 was judged adequate to provide representative average procedure time estimates and number  
4  
5 223 of visits to medical personnel, on which the total cost was based. Data are shown as mean and  
6  
7 224 SD and/or median and interquartile range (IQR). We calculated the average total cost of  
8  
9 225 treatment per patient when only 1 CCH injection is given. We also calculated the cost if 20%  
10  
11 226 of the patients would need 2 CCH injections given on separate sessions to obtain satisfactory  
12  
13 227 contracture reduction. Because some patients who developed skin tears during finger  
14  
15 228 extension chose to have dressing change, when necessary, at home or at primary care, only 1  
16  
17 229 nurse visit was recorded in the Patient Administrative System. We therefore made the  
18  
19 230 calculations assuming 1 of 3 patients in the CCH group would require 1 nurse visit. We also  
20  
21 231 conducted a sensitivity analysis with the conservative assumption of 1 nurse visit per patient.  
22  
23 232 All costs were calculated in Swedish Kronor (SEK) and converted to USD using the rate of 1  
24  
25 233 USD = 6.676 SEK (Sweden's Central Bank average for 2011). The within-group change in  
26  
27 234 extension deficit was analyzed with the Wilcoxon test. We also compared the 2 groups with  
28  
29 235 regard to improvement in total extension deficit using the Mann-Whitney test. A p value  
30  
31 236 below 0.05 was used to indicate statistical significance.  
32  
33  
34  
35  
36  
37  
38  
39  
40  
41  
42  
43  
44  
45  
46  
47  
48  
49  
50  
51  
52  
53  
54  
55  
56  
57  
58  
59  
60

1  
2  
3 237 **RESULTS**  
4

5 238  
6

7 239 The 16 patients in the CCH group and the 16 patients in the fasciectomy group had similar  
8  
9 240 characteristics (Table 1). In the fasciectomy group half of the patients received general  
10  
11 241 anaesthesia and the other half axillary block. The mean operating time was 62 (SD 27)  
12  
13 242 minutes, mean total OR time 138 (SD 43) minutes, and mean postoperative time spent at the  
14  
15 243 day-surgery recovery room until discharge 215 (SD 41) minutes. The median time from  
16  
17 244 surgery to end of therapy was 6.3 weeks (IQR 4.0-11.5) and to the postoperative follow-up by  
18  
19 245 the surgeon 7.5 weeks (IQR 6.0-12.0). None of the patients in the CCH group required further  
20  
21 246 therapy than the standard visits. Of the 16 patients, 9 developed skin tears ranging from minor  
22  
23 247 superficial skin breakage that did not require further wound care to deeper wound that  
24  
25 248 required 1 or more dressing changes. All wounds had healed within 2 weeks after injection.  
26  
27  
28  
29

30 249

31  
32 250 **Costs**  
33

34 251 The cost specifications for the two treatments are shown in Table 2. The largest treatment cost  
35  
36 252 for CCH injections was the cost of the injection itself (970.19 USD) and for fasciectomy the  
37  
38 253 cost of personnel (783.97 USD) and other costs (380.81 USD) associated with the surgery in  
39  
40 254 the operating room. Compared to fasciectomy, treatment with CCH injections required fewer  
41  
42 255 outpatient hospital visits to a nurse and a therapist (Table 3).  
43  
44  
45

46 256

47 257 The total treatment cost with 1 CCH injection was 33% lower than that for fasciectomy  
48  
49 258 (1418.04 versus 2102.56 USD). The cost was still lower (1675.24 USD) if 20% of patients  
50  
51 259 treated with CCH would require 2 injections in the same hand, given in separate sessions. In  
52  
53 260 the sensitivity analysis the cost of CCH injections assuming an average of 1 nurse visit per  
54  
55  
56  
57  
58  
59  
60



1  
2  
3 261 patient was 1472.51 USD when 1 injection is given and 1696.79 USD when 20% would  
4  
5 262 require 2 injections.  
6

7 263  
8

9  
10 264 **Outcomes**

11 265 Of the 16 patients in the CCH and fasciectomy groups, 7 and 9 patients respectively achieved  
12  
13 266 an extension deficit of 0 to 5 degrees in the joint with the largest extension deficit. In both  
14  
15 267 groups the improvement in total extension deficit was statistically significant ( $p < 0.001$ ) and  
16  
17 268 the extension deficits after CCH and fasciectomy were similar (median 10 degrees) (Table 3).  
18  
19 269 The median improvement in total extension deficit in the CCH group was 65 (IQR 56-81)  
20  
21 270 degrees and in the fasciectomy group 50 (IQR 41-60) degrees ( $p=0.007$ ).  
22  
23  
24

25 271 No complications were observed in any of the groups at the final follow-up.  
26  
27  
28  
29  
30  
31  
32  
33  
34  
35  
36  
37  
38  
39  
40  
41  
42  
43  
44  
45  
46  
47  
48  
49  
50  
51  
52  
53  
54  
55  
56  
57  
58  
59  
60

1  
2  
3 272 **DISCUSSION**  
4

5 273  
6

7 274 Our study shows that treatment of DC with a single collagenase injection is associated with  
8  
9 275 lower costs than surgery (fasciectomy) and the short-term outcomes (6 weeks) regarding  
10  
11 276 reduction in finger joint contractures are similar. The costs are still lower when assuming that  
12  
13 277 20% of the patients would require 2 injections in the same hand, but if more than 5 of 10  
14  
15 278 patients need 2 injections the costs would exceed those of fasciectomy. Our estimates of the  
16  
17 279 costs assuming 20% would require 2 injections were based on separate treatment sessions; the  
18  
19 280 costs would be even lower if the 2 injections are given in the same session, which would  
20  
21 281 probably become the usual practice.<sup>12</sup> Further, our results should be considered conservative  
22  
23 282 since we have not considered complications (such as wound infection and chronic regional  
24  
25 283 pain syndrome) that are probably more frequent after surgery than after CCH injections and  
26  
27 284 would therefore add to the total costs. The study by Hurst et al.<sup>7</sup> reported use of an average of  
28  
29 285 about 2 CCH injections per patient. However, in that study finger extension, which often is a  
30  
31 286 painful procedure, was done without anaesthesia, which may have reduced the degree of  
32  
33 287 initial contracture correction and thus necessitating a second injection. As in our study, use of  
34  
35 288 local anaesthesia is currently the standard procedure. In addition, Hurst et al. injected 0.58 mg  
36  
37 289 CCH into one part of the cord whereas our technique is to inject the whole content of a single  
38  
39 290 CCH injection (0.9 mg) into the cord at multiple sites, which would probably increase the  
40  
41 291 efficacy of a single injection.  
42  
43  
44  
45  
46  
47

48 292

49 293 For fasciectomy, the largest cost was represented by the various costs associated with a day-  
50  
51 294 surgery procedure of approximately 1 hour duration in the operating room. The cost would be  
52  
53 295 lower if the average operating time were shorter than our estimate of 62 minutes. In a recent  
54  
55 296 study of DC in 12 European countries (based on a surgeon survey and patient chart review),  
56  
57  
58  
59  
60

1  
2  
3 297 the mean operating time for fasciectomy across all countries was 67 minutes (Nordic 63,  
4  
5 298 Eastern 69, Western 66, and Mediterranean 68 minutes).<sup>4</sup> A potential advantage with CCH  
6  
7 299 injections is the possibility to treat patients with bilateral disease in 1 stage, which is  
8  
9 300 uncommon with surgery considering the nature of the procedure. In contrast, patients with  
10  
11 301 contractures involving 3 or more fingers can be treated with surgery in one session, but would  
12  
13 302 need at least 2 CCH injections and, in more severe cases, 2 or more treatment sessions.  
14  
15  
16 303

17  
18 304 Skin tears ranging from minor superficial skin breakage to deeper wounds occurred in more  
19  
20 305 than half the patients after CCH injections in our study. Skin tears following CCH injections  
21  
22 306 were reported in 11% in the multicenter randomized trial,<sup>7</sup> and in up to 19% in other  
23  
24 307 studies.<sup>13,14</sup> Skin tears are more likely to occur in severe contractures especially of the small  
25  
26 308 finger.<sup>9</sup> Because the incidence and severity of skin tears (ie, need for wound care) may vary  
27  
28 309 we calculated the costs assuming that, on average, one third of the patients would require 1  
29  
30 310 nurse visit and also did a sensitivity analysis assuming an average of 1 nurse visit. We believe  
31  
32 311 these estimates cover the costs of wound care even if the true incidence of skin tears is higher  
33  
34 312 than previously reported.  
35  
36 313

37  
38 314 We only compared direct costs, and therefore did not include costs of lost productivity or sick  
39  
40 315 leave. Among employed patients, sick leave is more likely to be necessary and longer after  
41  
42 316 fasciectomy than after CCH injections. According to the Swedish Social Insurance Agency  
43  
44 317 the total cost of a 1-week sick leave based on the average salary in Sweden 2011 (including  
45  
46 318 sick-pay, general payroll tax, vacation-pay and overhead costs) exceeds 1300 USD  
47  
48 319 ([www.scb.se](http://www.scb.se)). In addition, the direct costs of CCH injections and fasciectomy may differ  
49  
50 320 across countries and settings. In a Canadian study that estimated the cost (during 2005) of  
51  
52 321 open carpal tunnel release, a 10-minute procedure done under local anaesthesia, the total cost  
53  
54  
55  
56  
57  
58  
59  
60

1  
2  
3 322 (excluding surgeon's fee) was 137 CAD when done in the main operating room and 53 CAD  
4  
5 323 dollars when done in the office.<sup>15</sup> Although the largest treatment cost for CCH injections was  
6  
7 324 the cost of the injection itself, which may be substantially higher in some countries, the costs  
8  
9 325 of surgery in these countries may also be higher. In a study involving 24 patients treated with  
10  
11 326 fasciectomy at a single US hospital from 2008 to 2010 the average direct cost, defined as  
12  
13 327 costs billed from hospital charges (facility fees) and professional charges (surgeon and  
14  
15 328 anaesthesia fees) was estimated to be 11,240 USD.<sup>9</sup>  
16  
17  
18  
19

20  
21 330 A limitation of our study is that only very short-term outcomes were measured. The  
22  
23 331 improvement was high and the minor residual contracture was similar for CCH and  
24  
25 332 fasciectomy. Differences in long-term outcomes may change the cost-effectiveness of these  
26  
27 333 treatments because if they differ substantially in the recurrence rate and the need for further  
28  
29 334 treatments the cost of subsequent treatments should also be considered. According to the most  
30  
31 335 recent published data regarding recurrence after CCH injections (defined as contracture  
32  
33 336 increase of 20 degrees or greater in the presence of a palpable cord in joints initially corrected  
34  
35 337 to a maximum of 5-degree contracture), the overall rate in 623 joints at 3 years was 35%  
36  
37 338 (MCP 27% and PIP 56%) but the recurrence required treatment in only 7%.<sup>16</sup> Following  
38  
39 339 fasciectomy a 3-year recurrence rate of 12% has been reported in two studies; in the first  
40  
41 340 study, 4 of 33 hands had more than 30 degrees increase in joint contracture compared to 6  
42  
43 341 weeks,<sup>11</sup> and in the second study, 11 of 90 fingers showed progressive recurrence of PIP joint  
44  
45 342 contracture but no specific definition of recurrence was stated.<sup>17</sup> Thus, depending on the  
46  
47 343 proportion of patients that subsequently need repeated treatment because of recurrent  
48  
49 344 contracture in the treated fingers it is possible that in the long-term the direct costs of  
50  
51 345 treatment with CCH may exceed those of fasciectomy.  
52  
53  
54  
55  
56  
57  
58  
59  
60

1  
2  
3 347 Another limitation is that in the fasciectomy group the baseline range-of-motion  
4  
5 348 measurements were done by different surgeons and the follow-up measurements by different  
6  
7 349 therapists. The inter-observer reliability of these measurements is unknown and there might  
8  
9 350 be a risk that the surgeon overestimated the preoperative contracture and the treating therapist  
10  
11 351 underestimated residual contracture. However, we do not believe this issue has a substantial  
12  
13 352 influence because fasciectomy was the only treatment option and the results of the post-  
14  
15 353 treatment measurements, done by therapists, were similar in both groups.  
16  
17  
18  
19

20  
21 355 In conclusion, treatment of DC with a single CCH injection costs 33% less, in direct costs,  
22  
23 356 than fasciectomy with equivalent short-term efficacy (6 weeks) regarding reduction in  
24  
25 357 contracture.  
26

27 358  
28  
29  
30  
31  
32  
33  
34  
35  
36  
37  
38  
39  
40  
41  
42  
43  
44  
45  
46  
47  
48  
49  
50  
51  
52  
53  
54  
55  
56  
57  
58  
59  
60

1  
2  
3 359 **Funding**  
4

5 360 This research was supported by Hässleholm Hospital. The funding source (public hospital)  
6  
7 361 had no role in the conduct of the study, data analysis and interpretation, or decision to submit  
8  
9 362 the article for publication. No commercial entities were involved at any stage.  
10  
11 363

12  
13  
14 364 **Acknowledgements**  
15

16 365 The authors acknowledge the valuable help from Ms Saskia Titman, anaesthesia nurse, and  
17  
18 366 Ms Marie Davidsson, research coordinator, Department of Orthopedics, Hässleholm Hospital.  
19  
20 367

21  
22  
23 368 **Contributorship Statement**  
24

25 369 IA, ES, AL: Study conception and design, acquisition of data, analysis and interpretation of  
26  
27 370 data, and drafting of the article.  
28

29 371 EA: Acquisition of data, and critical revision of the article for important intellectual content.  
30

31 372 MW: Analysis and interpretation of data and critical revision of the article for important  
32  
33 373 intellectual content.  
34

35 374 All authors approved the final submitted version.  
36  
37

38 375 **Competing Interests**  
39

40 376 Dr. Atroshi was a member of an Expert Group on Dupuytren's disease for Pfizer 2012. The  
41  
42 377 other authors have no competing interests.  
43  
44

45 378 **Data Sharing Statement**  
46

47 379 **Data are available on request from Dr. Atroshi**  
48  
49 380  
50  
51  
52  
53  
54  
55  
56  
57  
58  
59  
60

## REFERENCES

1. Desai SS, Hentz VR. The treatment of Dupuytren disease. *J Hand Surg Am* 2011;36:936-42.
2. Statistical Databse. *The National Board of health and Welfare* 2013. Available at <http://www.socialstyrelsen.se/statistik/statistikdatabas/dagkirurgi>. Accessed 14-09-2013.
3. Skåne County. Annual Report. *Skåne County* 2010. Available at [http://www.skane.se/upload/Webbplatser/Skaneportalen-extern/OmRegionSkane/ekonomi/arsredovisning/2010/ÅR\\_2010\\_110426.pdf](http://www.skane.se/upload/Webbplatser/Skaneportalen-extern/OmRegionSkane/ekonomi/arsredovisning/2010/ÅR_2010_110426.pdf). Accessed 14-09-2013.
4. Dias J, Bainbridge C, Leclercq C et al. Surgical management of Dupuytren's contracture in Europe: regional analysis of a surgeon survey and patient chart review. *Int J Clin Pract* 2013;67:271-81.
5. Crean SM, Gerber RA, Le Graverand MP, et al. The efficacy and safety of fasciectomy and fasciotomy for Dupuytren's contracture in European patients: a structured review of published studies. *J Hand Surg Eur Vol* 2011;36:396-407.
6. Hogemann A, Wolfhard U, Kendoff D, et al. Results of total aponeurotomy for Dupuytren's contracture in 61 patients: a retrospective clinical study. *Arch Orthop Trauma Surg* 2009;129:195-201.
7. Hurst LC, Badalamente MA, Hentz VR et al. Injectable collagenase clostridium histolyticum for Dupuytren's contracture. *N Engl J Med* 2009;361:968-79.
8. Chen NC, Shauver MJ, Chung KC. Cost-effectiveness of open partial fasciectomy, needle aponeurotomy, and collagenase injection for dupuytren contracture. *J Hand Surg Am* 2011;36:1826-34.
9. Herrera FA, Benhaim P, Suliman A, et al. Cost Comparison of Open Fasciectomy Versus Percutaneous Needle Aponeurotomy for Treatment of Dupuytren Contracture. *Ann Plast Surg* 2013;70:454-6.
10. Hurst L. Dupuytren's contracture. In: Green's Operative Hand Surgery. 6th Edition ed. Wolfe SW, Hotchkiss RN, Pederson WC, Kozin SH. Elsevier; 2010. Philadelphia, PA. p153-4.
11. van Rijssen AL, ter Linden H, Werker PM. Five-year results of a randomized clinical trial on treatment in Dupuytren's disease: percutaneous needle fasciotomy versus limited fasciectomy. *Plast Reconstr Surg* 2012;129:469-77.
12. Coleman S, Gilpin D, Tursi J, et al. Multiple concurrent collagenase clostridium histolyticum injections to Dupuytren's cords: an exploratory study. *BMC Musculoskeletal Disord* 2012;13:61.
13. Skirven TM, Bachoura A, Jacoby SM, et al. The effect of a therapy protocol for increasing correction of severely contracted proximal interphalangeal joints caused by

- 1  
2  
3 420 dupuytren disease and treated with collagenase injection. *J Hand Surg Am* 2013;38:684-  
4 421 9.  
5  
6 422 14. Manning CJ, Delaney R, Hayton MJ. Efficacy and tolerability of Day 2 manipulation  
7 423 and local anaesthesia after collagenase injection in patients with Dupuytren's  
8 424 contracture. *J Hand Surg Eur Vol* 2013. Epub ahead of print (PMID:23719171).  
9  
10 425 15. Leblanc MR, Lalonde J, Lalonde DH. A detailed cost and efficiency analysis of  
11 426 performing carpal tunnel surgery in the main operating room versus the ambulatory  
12 427 setting in Canada. *Hand (N Y)* 2007;2:173-8.  
13  
14 428 16. Peimer CA, Blazar P, Coleman S et al. Dupuytren contracture recurrence following  
15 429 treatment with collagenase clostridium histolyticum (CORDLESS study): 3-year data. *J*  
16 430 *Hand Surg Am* 2013;38:12-22.  
17  
18 431 17. Ullah AS, Dias JJ, Bhowal B. Does a 'firebreak' full-thickness skin graft prevent  
19 432 recurrence after surgery for Dupuytren's contracture?: a prospective, randomised trial. *J*  
20 433 *Bone Joint Surg Br* 2009;91:374-8.  
21 434  
22 435  
23  
24  
25 436  
26  
27  
28  
29  
30  
31  
32  
33  
34  
35  
36  
37  
38  
39  
40  
41  
42  
43  
44  
45  
46  
47  
48  
49  
50  
51  
52  
53  
54  
55  
56  
57  
58  
59  
60



437 **Table 1** Characteristics of the two samples of patients with Dupuytren's contracture treated with  
 438 collagenase clostridium histolyticum injection or surgery (fasciectomy)

|                              | CCH injection | Fasciectomy |
|------------------------------|---------------|-------------|
| Number of patients (men)     | 16 (11)       | 16 (13)     |
| Age (yrs), mean (SD)         | 69 (4)        | 71 (5)      |
| Number of fingers treated*   |               |             |
| Small                        | 11            | 9           |
| Ring                         | 7             | 8           |
| Middle                       | 0             | 1           |
| Extension deficit (degrees)  |               |             |
| Total <sup>†</sup> mean (SD) | 90 (39)       | 71 (28)     |
| median (IQR)                 | 70 (60-115)   | 75 (45-89)  |
| MCP <sup>‡</sup> mean (SD)   | 64 (16)       | 60 (17)     |
| median (IQR)                 | 65 (60-75)    | 60 (41-80)  |
| PIP <sup>‡</sup> mean (SD)   | 55 (22)       | 46 (18)     |
| median (IQR)                 | 55 (43-70)    | 40 (35-48)  |

439  
 440 CCH, collagenase clostridium histolyticum; IQR, interquartile range

441 \*2 patients in each group had 2 fingers treated.

442 <sup>†</sup> Metacarpophalangeal (MCP) plus proximal interphalangeal (PIP) joints in all treated fingers (in  
 443 patients with 2 fingers treated the finger with largest extension deficit was used).

444 <sup>‡</sup> The values showing MCP and PIP extension deficits separately include only joints with contracture  
 445 (no MCP contracture in 1 patient in the CCH group and 2 patients in the fasciectomy group and no  
 446 PIP contracture in 7 patients in each group).

447 **Table 2** Cost specification for the various stages of treating Dupuytren's contracture  
 448 with collagenase clostridium histolyticum injection or surgery (fasciectomy)

|                                                     | Personnel costs <sup>*</sup> | Other costs <sup>†</sup> |
|-----------------------------------------------------|------------------------------|--------------------------|
|                                                     | (USD)                        | (USD)                    |
| Doctor visit, CCH or fasciectomy (doctor and nurse) | 65.80                        | 16.78                    |
| Injection, CCH (doctor and nurse)                   | 70.63                        | 991.16                   |
| Finger extension, CCH (doctor and nurse)            | 70.63                        | 20.97                    |
| Therapist visit, CCH                                | 26.58                        | 25.16                    |
| Surgery, fasciectomy (doctors and others)           | 783.97                       | 380.81                   |
| Day surgery care, fasciectomy                       | 88.10                        | 52.41                    |
| Therapist visit, fasciectomy                        | 39.88                        | 37.77                    |
| Nurse visit, CCH or fasciectomy                     | 43.51                        | 37.77                    |

449  
 450 CCH, collagenase clostridium histolyticum; USD, United States dollars

451 \*Include average salary, social security contributions, vacation pay, sick pay, overhead costs, and the  
 452 degree of capacity utilization.

453 †Include costs of surgical and other materials, injections, premises, etc.

454 Price of 1 CCH injection = 970.19 USD.

455 **Table 3** Number of visits to medical personnel, actual costs and short-term outcomes of treating  
 456 Dupuytren's contracture with collagenase clostridium histolyticum injection or surgery (fasciectomy)

|                                                               | CCH injection | Fasciectomy        |
|---------------------------------------------------------------|---------------|--------------------|
| Mean, median (IQR) number of visits to:                       |               |                    |
| Doctor                                                        | 3*            | 2*                 |
| Nurse                                                         | 0.33*         | 3.0, 3.0 (2.0-3.8) |
| Therapist                                                     | 3*            | 5.1, 4.0 (3.0-6.8) |
| Total cost per patient (USD)                                  | 1418.04       | 2102.56            |
| Total cost per patient when<br>20% require 2 injections (USD) | 1675.24       | 2102.56            |
| Extension deficit (degrees) <sup>†</sup>                      |               |                    |
| Total                                                         | mean (SD)     | 20 (25)            |
|                                                               | median (IQR)  | 10 (0-30)          |
| MCP                                                           | mean (SD)     | 10 (17)            |
|                                                               | median (IQR)  | 0 (0-15)           |
| PIP                                                           | mean (SD)     | 23 (18)            |
|                                                               | median (IQR)  | 20 (8-35)          |

457  
 458 CCH, collagenase clostridium histolyticum; IQR, interquartile range; USD, United States dollars

459 \* Number of visits to a doctor in both groups and to a therapist in the CCH group was similar for all  
 460 patients (Figure 1); a third of CCH patients assumed to require 1 visit to a nurse.

461 <sup>†</sup> Metacarpophalangeal (MCP) plus proximal interphalangeal (PIP) joints in all treated fingers. The  
 462 values showing MCP and PIP extension deficits separately include only joints with pretreatment  
 463 contracture (see footnote in Table 1).

1  
2  
3 464 **Figure legend**  
4

5 465  
6

7 466 **Figure 1.** Diagram showing the various stages of treating patients with Dupuytren's  
8  
9 467 contracture with collagenase clostridium histolyticum (CCH) injection or with fasciectomy as  
10  
11 468 a day-surgery procedure performed in the operating room (OR). The number of visits is 1  
12  
13 469 unless specified otherwise.  
14  
15  
16  
17  
18  
19  
20  
21  
22  
23  
24  
25  
26  
27  
28  
29  
30  
31  
32  
33  
34  
35  
36  
37  
38  
39  
40  
41  
42  
43  
44  
45  
46  
47  
48  
49  
50  
51  
52  
53  
54  
55  
56  
57  
58  
59  
60

1  
2  
3  
4  
5  
6  
7  
8  
9  
10  
11  
12  
13  
14  
15  
16  
17  
18  
19  
20  
21  
22  
23  
24  
25  
26  
27  
28  
29  
30  
31  
32  
33  
34  
35  
36  
37  
38  
39  
40  
41  
42  
43  
44  
45  
46  
47  
48  
49

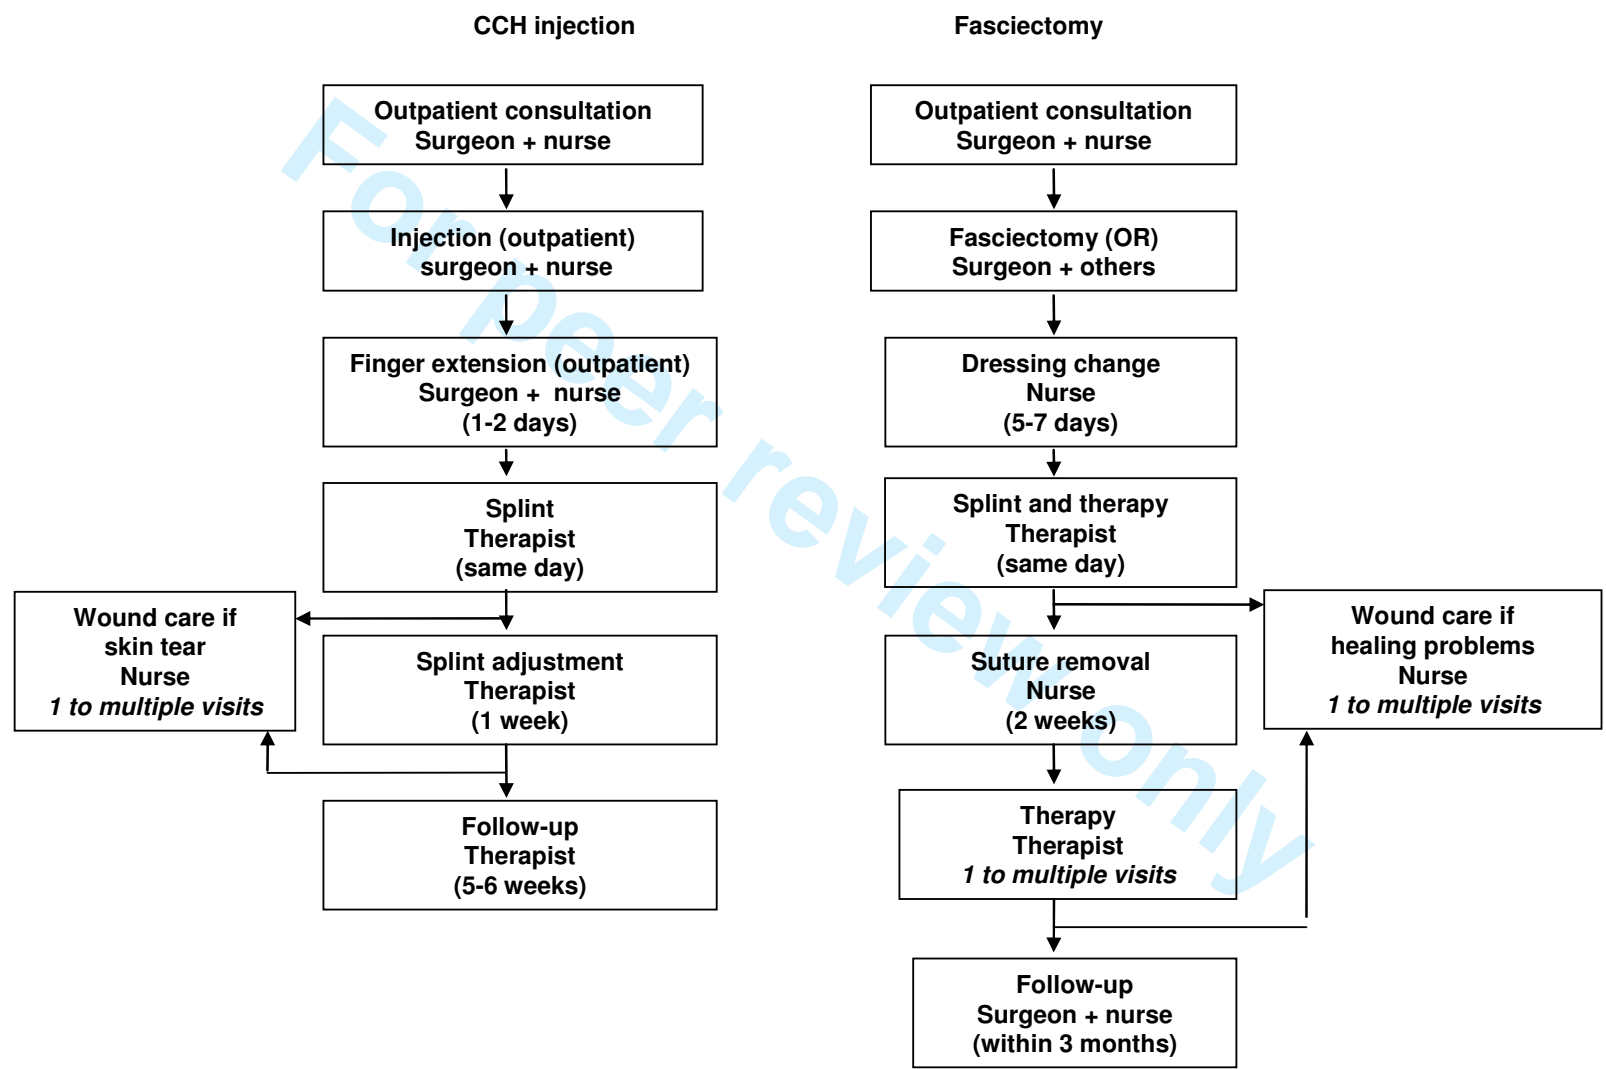

1  
2  
3 1 **Costs for collagenase injections compared with fasciectomy in the treatment**  
4  
5 2 **of Dupuytren's contracture: A retrospective cohort study**  
6  
7  
8  
9  
10  
11  
12

13 5 Isam Atroshi, MD, PhD<sup>1,2</sup> Emelie Strandberg, MS (Econ),<sup>1</sup> Anna Lauritzson, OT,<sup>1</sup>

14 6 Eva Ahlgren, RN,<sup>1</sup> Markus Waldén, MD, PhD,<sup>1,3</sup>  
15  
16  
17  
18  
19  
20  
21  
22  
23  
24  
25  
26  
27  
28  
29  
30  
31  
32  
33  
34  
35  
36  
37  
38  
39  
40  
41  
42  
43  
44  
45  
46  
47  
48  
49  
50  
51  
52  
53  
54  
55  
56  
57  
58  
59  
60

9 <sup>1</sup>Department of Orthopedics Hässleholm-Kristianstad, Hässleholm Hospital, Hässleholm,  
10 Sweden

11 <sup>2</sup>Department of Clinical Sciences, Lund University, Lund, Sweden

12 <sup>3</sup>Department of Medical and Health Sciences, Linköping University, Linköping, Sweden  
13

14 Correspondence:

15 Isam Atroshi, Department of Orthopedics, Hässleholm Hospital, SE28125 Hässleholm,  
16 Sweden. Tel: +46443091279, E-mail: [Isam.Atroshi@skane.se](mailto:Isam.Atroshi@skane.se)  
17

18 Word count: 3692

1  
2  
3 19 **Abstract**

4  
5 20 **Objectives:** To compare collagenase injections and surgery (fasciectomy) for Dupuytren's  
6  
7 21 contracture (DC) regarding actual total direct treatment costs and short-term outcomes.

8  
9  
10 22 **Design:** Retrospective cohort study

11  
12 23 **Setting:** Orthopaedic department of a regional hospital in Sweden.

13  
14 24 **Participants:** Patients aged 65 years or older with previously untreated DC of 30 degrees or  
15  
16 25 greater in the metacarpophalangeal (MCP) and/or proximal interphalangeal (PIP) joints of the  
17  
18 26 small, ring or middle finger. The collagenase group comprised 16 consecutive patients treated  
19  
20 27 during the first 6 months following the introduction of collagenase as treatment for DC at the  
21  
22 28 study centre. The controls were 16 patients randomly selected among those operated on with  
23  
24 29 fasciectomy at the same centre during the preceding 3 years.

25  
26  
27 30 **Interventions:** Treatment with collagenase was given during two standard outpatient clinic  
28  
29 31 visits (injection of 0.9 mg, distributed at multiple sites in a palpable cord, and next-day finger  
30  
31 32 extension under local anaesthesia) followed by night-time splinting. Fasciectomy was done in  
32  
33 33 the operating room (day surgery) under general or regional anaesthesia using standard  
34  
35 34 technique, followed by therapy and splinting.

36  
37  
38 35 **Primary and secondary outcome measures:** Actual total direct costs (salaries of all medical  
39  
40 36 personnel involved in care, medications, materials and other relevant costs), and total MCP  
41  
42 37 and PIP extension deficit (degrees) measured by hand therapists at 6-12 weeks after treatment.

43  
44 38 **Results:** Collagenase injection required fewer hospital outpatient visits to a therapist and  
45  
46 39 nurse than fasciectomy. Total treatment cost for collagenase injection was 1418.04 USD and  
47  
48 40 for fasciectomy 2102.56 USD. The post-treatment median (interquartile range) total extension  
49  
50 41 deficit was 10 (0-30) for the collagenase group and 10 (0-34) for the fasciectomy group.

51  
52 42 **Conclusions:** Treatment of Dupuytren's contracture with one collagenase injection costs 33%  
53  
54 43 less than fasciectomy with equivalent efficacy at 6 weeks regarding reduction in contracture.  
55  
56  
57  
58  
59  
60

1  
2  
3 44 **Strengths and limitations of this study**  
4  
5

6 45

- 7 46 • This study presents previously unknown estimates of the actual costs of treating  
8  
9 Dupuytren's contracture with Collagenase injections or fasciectomy  
10  
11 47  
12 48 • Comparison of the actual costs of the two treatments are based on detailed definition and  
13  
14 49 measurement of all relevant costs  
15  
16 50 • Outcomes of injections were prospectively measured but outcomes of surgery were based  
17  
18 51 on medical records  
19  
20 52 • Costs may vary across countries  
21  
22 53 • Only short-term outcomes (6 weeks) were compared  
23  
24  
25  
26  
27  
28  
29  
30  
31  
32  
33  
34  
35  
36  
37  
38  
39  
40  
41  
42  
43  
44  
45  
46  
47  
48  
49  
50  
51  
52  
53  
54  
55  
56  
57  
58  
59  
60



## 54 INTRODUCTION

55

56 Dupuytren's contracture (DC) is a common hand disorder causing finger contractures that  
57 may compromise hand function. Surgery in the form of limited fasciectomy has been the main  
58 treatment option for reducing the contracture.<sup>1</sup> In Sweden (population 9.5 millions), more  
59 than 3000 fasciectomy procedures are performed annually;<sup>2</sup> the actual number is probably  
60 higher because procedures performed by surgeons in private practice, although constituting a  
61 small proportion,<sup>3</sup> may not always be reported to the national database. Surgery is usually  
62 done in the main operating room under general or regional anaesthesia and the operating time  
63 is on average about 1 hour,<sup>4</sup> but can be substantially longer when severe contractures are  
64 present in multiple fingers. After surgery many patients require therapy and splints. Although  
65 surgery is often effective in reducing the contracture, postoperative complications such as  
66 nerve injury and wound healing problems are common and patients may develop contracture  
67 recurrence.<sup>5,6</sup>

68

69 Recently, injection with collagenase clostridium histolyticum (CCH) has been introduced as  
70 the first pharmacological treatment for DC after it was shown in a randomized controlled trial  
71 to be more effective than placebo injections in reducing contractures.<sup>7</sup> The treatment is a  
72 relatively simple procedure given in the outpatient clinic and rarely requires prolonged  
73 therapy. The current price of a CCH injection (in Sweden) is almost one thousand US dollars  
74 (USD) and one injection is used for each finger involved (unless contractures in 2 fingers are  
75 caused by a common cord). Because of economic pressure to control health care expenditures,  
76 the cost-effectiveness of surgical procedures has gained increased significance in hospital  
77 decision making. The cost analysis of different treatment procedures such as fasciectomy and

1  
2  
3 78 injection is therefore essential and the differences in short-term costs associated with these  
4  
5 79 two techniques are important to consider.  
6  
7  
8

9  
10 81 To our knowledge no previous study has compared the actual costs of CCH injections with  
11  
12 82 those of fasciectomy. One study based on a cost-utility analysis model concluded that open  
13  
14 83 partial fasciectomy did not meet the cost-effectiveness threshold and that CCH injections  
15  
16 84 would be cost-effective when priced below 945 USD.<sup>8</sup> Studies concerning costs of surgery  
17  
18 85 have usually used reimbursement as a measure of costs,<sup>9</sup> but reimbursement does not  
19  
20 86 necessarily reflect the actual cost of a procedure. Reimbursement levels for a certain  
21  
22 87 procedure may vary substantially across and even within countries. For cost comparison of  
23  
24 88 CCH injections and fasciectomy in DC the actual cost of each procedure is therefore a more  
25  
26 89 relevant measure. When comparing the costs of two treatment methods, the outcome of the  
27  
28 90 treatments must also be taken into consideration. However, we could not find studies that  
29  
30 91 have compared the outcomes of CCH and fasciectomy.  
31  
32  
33

34 92  
35  
36 93 The main aim of this retrospective cohort study was to compare CCH injections with  
37  
38 94 fasciectomy regarding the actual total direct treatment costs. The secondary aim was to  
39  
40 95 compare the short-term outcomes of these two treatment methods.  
41  
42  
43  
44  
45  
46  
47  
48  
49  
50  
51  
52  
53  
54  
55  
56  
57  
58  
59  
60

1  
2  
3 97 **PATIENTS AND METHODS**  
4

5 98  
6

7 99 **Study participants**  
8

9  
10 100 We conducted a **retrospective** cohort study at one orthopaedic department (Hässleholm,  
11  
12 101 Kristianstad and Ystad Hospitals) in southern Sweden. The department is the only centre that  
13  
14 102 treats patients with DC in a region with approximately 300,000 inhabitants.  
15

16 103  
17

18 104 Data on CCH injections were collected prospectively starting September 2011 when CCH  
19  
20 105 was introduced as the main treatment option for DC at the department. The indication for  
21  
22 106 treatment with CCH injections was identical to that previously used for surgery at the study  
23  
24 107 centre, namely a palpable cord and contracture of 30 degrees or greater in the  
25  
26 108 metacarpophalangeal (MCP) **and/or** proximal interphalangeal (PIP) joints. For this study we  
27  
28 109 included the first 16 consecutive patients, aged 65 years or older, treated with CCH injections  
29  
30 110 during the first 6 months (September 2011 through February 2012). We restricted the study to  
31  
32 111 patients of non-working age because we aimed to compare only direct costs.  
33  
34  
35

36 112  
37

38 113 Data on fasciectomy were extracted from the medical records of patients treated at the  
39  
40 114 department before the introduction of CCH injections. The patients were chosen among those  
41  
42 115 aged 65 years or older, operated on with fasciectomy January 2009 through June 2011.  
43

44 116 Patients with surgery on more than 2 fingers, previous surgery for DC in the same hand, and  
45  
46 117 additional procedures performed (e.g. skin graft or amputation) were excluded. A total of 113  
47  
48 118 patients were potentially eligible. Of these, a random sample of 15% was chosen by computer  
49  
50 119 (statistical software), yielding 18 patients; 2 were excluded (1 had surgery for DC in the  
51  
52 120 thumb and 1 chose to have postoperative therapy at another location). Thus, the fasciectomy  
53  
54 121 group included 16 patients.  
55  
56  
57  
58  
59  
60

1  
2  
3 122 **Treatment and follow-up procedures**  
4

5 123 Both treatments required an initial standard outpatient consultation visit to a hand surgeon or  
6  
7 124 an orthopaedic surgeon, usually as a referral from the patient's general practitioner. Each  
8  
9 125 surgeon was assisted by a nurse at the outpatient clinic. During the visit the treatment decision  
10  
11 126 was made and the patient was scheduled for treatment (Fig 1).  
12  
13

14  
15  
16 128 **Collagenase injection:** Treatment with CCH required two standard outpatient visits to a hand  
17  
18 129 surgeon: injection and next-day finger extension.<sup>7</sup> During these visits the surgeon was assisted  
19  
20 130 by a nurse (all treatments were given by the same hand surgeon). A modified injection  
21  
22 131 method was used for all treated fingers; after reconstituting CCH with 0.39 ml of diluent,  
23  
24 132 according to the standard procedure, all the reconstituted CCH (0.9 mg) was injected into the  
25  
26 133 cord, distributed at multiple sites. The following day, finger manipulation (extension) was  
27  
28 134 done under local anaesthesia. Immediately after finger extension the patient went to the  
29  
30 135 therapist and received a splint for use at night for 8 weeks. A second visit to the therapist was  
31  
32 136 done 1 week post-injection for splint adjustment and therapy instructions. Patients who during  
33  
34 137 finger extension developed a skin tear that was judged to require dressing change were asked  
35  
36 138 to visit a nurse within 2 to 3 days. Further visits to the nurse were done when necessary,  
37  
38 139 depending on wound status. No routine post-treatment visits were scheduled to the treating  
39  
40 140 surgeon and the final follow-up (usually at 5-6 weeks) was done by the therapist. If the patient  
41  
42 141 was not satisfied with the degree of correction after the first injection, the therapist arranged a  
43  
44 142 consultation to the treating surgeon for consideration of further treatment.  
45  
46  
47  
48  
49

50  
51  
52 144 **Fasciectomy:** Fasciectomy was done as a day-surgery procedure in the main operating room  
53  
54 145 (OR). The surgery was done by one of six different surgeons (three experienced hand  
55  
56 146 surgeons and three orthopaedic surgeons with experience in hand surgery) using standard  
57  
58  
59  
60

1  
2  
3 147 technique for limited open fasciectomy.<sup>10</sup> General anaesthesia or axillary block was used.  
4  
5 148 According to routine procedures at the hospital general anaesthesia was administered by a  
6  
7 149 nurse anaesthetist and axillary block was administered by an anaesthesiologist, after which  
8  
9 150 the nurse anaesthetist was in charge of the patient's care with anaesthesiologist help obtained  
10  
11 151 when needed. The surgery was done by a surgeon (no assistant) with a team consisting of an  
12  
13 152 OR nurse, a nurse anaesthetist and 2 nurse assistants (1 participated only in the initial  
14  
15 153 preparations). The electronic records for each surgical procedure include the exact start and  
16  
17 154 finish times for the preparations before surgery, anaesthesia, the actual surgery (i.e. operating  
18  
19 155 time from incision to dressing), and the work done after the surgeon has completed the  
20  
21 156 operation and until the patient is taken back to the recovery room. After returning from the  
22  
23 157 OR the patient stayed in the recovery room until discharge from the day-surgery unit. The  
24  
25 158 time of discharge is documented in the electronic records. Thus, for each patient 3 times were  
26  
27 159 recorded; the operating time, the total OR time (from start of preparations until room ready  
28  
29 160 for next procedure), and the time at the recovery room until discharge.  
30  
31  
32  
33

34 161  
35  
36 162 After fasciectomy all patients visited a nurse for dressing change after 5 to 7 days, followed  
37  
38 163 immediately by a visit to a therapist for a splint and therapy instructions. A second visit to the  
39  
40 164 nurse for wound inspection and suture removal was done at approximately 2 weeks. Further  
41  
42 165 visits to the nurse were done when necessary, depending on wound status. Patients also had  
43  
44 166 further visits to the therapist for scar management, splint adjustments and therapy instructions  
45  
46 167 as required. The treating therapist decided on the frequency and duration of therapy. Patients  
47  
48 168 had 1 postoperative follow-up visit to the surgeon timed according to surgeon preference.  
49  
50  
51

52 169  
53  
54 170  
55  
56 171  
57  
58  
59  
60

1  
2  
3 172 **Cost measurement**  
4

5 173 A detailed analysis of the salaries of physicians and non-physician medical personnel  
6  
7 174 involved in the treatment of patients with DC was performed for CCH injection and  
8  
9 175 fasciectomy. We identified the average salaries of individuals and used the average time units  
10  
11 176 to calculate the cost of manpower. The costs of all materials, premises and other costs were  
12  
13 177 calculated. We included fixed assets such as the costs of the premises and its expenses and the  
14  
15 178 costs of surgical equipment. All costs were measured based on 2011 salaries/prices. These  
16  
17 179 costs include; salaries of all medical personnel involved in the direct care of the patients  
18  
19 180 including social security contributions, vacation pay and sick pay (averaged for each category:  
20  
21 181 specialist orthopaedic surgeon, anaesthesiologist, nurse, nurse assistant and therapist),  
22  
23 182 hospital overhead costs, the degree of capacity utilization, medications, surgical and other  
24  
25 183 material, premises and other costs. The average salaries were based on all respective medical  
26  
27 184 personnel group in the public health care sector in the region. We did not include costs of  
28  
29 185 non-medical personnel involved in the care (such as receptionists, secretaries, cleaners, etc).  
30  
31  
32  
33

34 186  
35  
36 187 A standard outpatient visit to a doctor was 20 minutes. For the 2 CCH visits (injection and  
37  
38 188 finger extension) we used the standard time for the surgeon and 25 minutes for the assisting  
39  
40 189 nurse (to account for the time needed for preparations and work after the session had ended).  
41  
42 190 For fasciectomy we used the mean operating time, total OR time and recovery time, according  
43  
44 191 to the personnel involved and adjusted as required. For the operating surgeon we used the  
45  
46 192 mean operating time plus 25 minutes needed for additional work (assessing the patient and  
47  
48 193 marking the surgical site before surgery, scrubbing, writing the surgical notes and discharging  
49  
50 194 the patient after surgery). For the non-physician personnel we used the mean total operating  
51  
52 195 room time and for the anaesthesiologist we used half that time (one anaesthesiologist is  
53  
54 196 usually assigned to 2 operating rooms simultaneously and the care of these patients after  
55  
56  
57  
58  
59  
60

1  
2  
3 197 surgery). For recovery room personnel (a nurse and a nurse assistant are in charge of up to 5  
4  
5 198 patients simultaneously), we used a fifth of the recovery time plus 5 minutes (preoperative  
6  
7 199 preparations). A standard outpatient visit to a nurse (for wound care after CCH injection or  
8  
9 200 fasciectomy) was 45 minutes. A standard visit to therapist after CCH injection was 30  
10  
11 201 minutes and after fasciectomy 45 minutes. For each patient the exact number of hospital  
12  
13 202 outpatient visits to a doctor, nurse or therapist, related to the treatments, was retrieved from  
14  
15 203 the Patient Administrative System.  
16  
17  
18  
19  
20

### 21 **Outcome measurement**

22  
23 206 At baseline and at all follow-up visits range of motion including extension and flexion of the  
24  
25 207 MCP and PIP joints of the fingers was measured with a goniometer. In the fasciectomy group  
26  
27 208 the baseline measurements were done by the surgeons during the visit that resulted in the  
28  
29 209 patient being scheduled for fasciectomy and the post-treatment measurements were done by  
30  
31 210 six different therapists; these measurements were recorded in the patient's electronic medical  
32  
33 211 records. In the CCH group all measurements (immediately before injection and at follow-up)  
34  
35 212 were done by the same therapist, as part of a research project. The measurements recorded at  
36  
37 213 baseline and at the final visit were used in the analysis.  
38  
39  
40  
41  
42

### 43 **Analysis**

44  
45 216 In 2 previous randomized trials the proportion of MCP joints that were reduced to 0 to 5  
46  
47 217 degrees of extension deficit was 45% at 30 days after first CCH injection<sup>7</sup> and 94% at 6  
48  
49 218 weeks after fasciectomy.<sup>11</sup> To detect a difference of this magnitude between the 2 groups  
50  
51 219 (80% power and 0.05 significance level) would require a sample of 13 patients in each group.  
52  
53 220 The cost estimation of CCH was based on standard procedures independent of sample size.  
54  
55 221 For the cost of fasciectomy, a random sample of 15% from 113 fasciectomy-treated patients  
56  
57  
58  
59  
60

1  
2  
3 222 was judged adequate to provide representative average procedure time estimates and number  
4  
5 223 of visits to medical personnel, on which the total cost was based. Data are shown as mean and  
6  
7 224 SD and/or median and interquartile range (IQR). We calculated the average total cost of  
8  
9 225 treatment per patient when only 1 CCH injection is given. We also calculated the cost if 20%  
10  
11 226 of the patients would need 2 CCH injections given on separate sessions to obtain satisfactory  
12  
13 227 contracture reduction. Because some patients who developed skin tears during finger  
14  
15 228 extension chose to have dressing change, when necessary, at home or at primary care, only 1  
16  
17 229 nurse visit was recorded in the Patient Administrative System. We therefore made the  
18  
19 230 calculations assuming 1 of 3 patients in the CCH group would require 1 nurse visit. We also  
20  
21 231 conducted a sensitivity analysis with the conservative assumption of 1 nurse visit per patient.  
22  
23 232 All costs were calculated in Swedish Kronor (SEK) and converted to USD using the rate of 1  
24  
25 233 USD = 6.676 SEK (Sweden's Central Bank average for 2011). The within-group change in  
26  
27 234 extension deficit was analyzed with the Wilcoxon test. We also compared the 2 groups with  
28  
29 235 regard to improvement in total extension deficit using the Mann-Whitney test. A p value  
30  
31 236 below 0.05 was used to indicate statistical significance.  
32  
33  
34  
35  
36  
37  
38  
39  
40  
41  
42  
43  
44  
45  
46  
47  
48  
49  
50  
51  
52  
53  
54  
55  
56  
57  
58  
59  
60



1  
2  
3 237 **RESULTS**

4  
5 238

6  
7 239 The 16 patients in the CCH group and the 16 patients in the fasciectomy group had similar  
8  
9 240 characteristics (Table 1). In the fasciectomy group half of the patients received general  
10  
11 241 anaesthesia and the other half axillary block. The mean operating time was 62 (SD 27)  
12  
13 242 minutes, mean total OR time 138 (SD 43) minutes, and mean postoperative time spent at the  
14  
15 243 day-surgery recovery room until discharge 215 (SD 41) minutes. The median time from  
16  
17 244 surgery to end of therapy was 6.3 weeks (IQR 4.0-11.5) and to the postoperative follow-up by  
18  
19 245 the surgeon 7.5 weeks (IQR 6.0-12.0). None of the patients in the CCH group required further  
20  
21 246 therapy than the standard visits. Of the 16 patients, 9 developed skin tears ranging from minor  
22  
23 247 superficial skin breakage that did not require further wound care to deeper wound that  
24  
25 248 required 1 or more dressing changes. All wounds had healed within 2 weeks after injection.  
26  
27  
28  
29

30 249

31  
32 250 **Costs**

33  
34 251 The cost specifications for the two treatments are shown in Table 2. The largest treatment cost  
35  
36 252 for CCH injections was the cost of the injection itself (970.19 USD) and for fasciectomy the  
37  
38 253 cost of personnel (783.97 USD) and other costs (380.81 USD) associated with the surgery in  
39  
40 254 the operating room. Compared to fasciectomy, treatment with CCH injections required fewer  
41  
42 255 outpatient hospital visits to a nurse and a therapist (Table 3).  
43  
44  
45

46 256

47 257 The total treatment cost with 1 CCH injection was 33% lower than that for fasciectomy  
48  
49 258 (1418.04 versus 2102.56 USD). The cost was still lower (1675.24 USD) if 20% of patients  
50  
51 259 treated with CCH would require 2 injections in the same hand, given in separate sessions. In  
52  
53 260 the sensitivity analysis the cost of CCH injections assuming an average of 1 nurse visit per  
54  
55  
56  
57  
58  
59  
60

1  
2  
3 261 patient was 1472.51 USD when 1 injection is given and 1696.79 USD when 20% would  
4  
5 262 require 2 injections.  
6

7 263

8  
9 264 **Outcomes**

10  
11 265 Of the 16 patients in the CCH and fasciectomy groups, 7 and 9 patients respectively achieved  
12  
13 266 an extension deficit of 0 to 5 degrees in the joint with the largest extension deficit. In both  
14  
15 267 groups the improvement in total extension deficit was statistically significant ( $p < 0.001$ ) and  
16  
17 268 the extension deficits after CCH and fasciectomy were similar (median 10 degrees) (Table 3).  
18  
19 269 The median improvement in total extension deficit in the CCH group was 65 (IQR 56-81)  
20  
21 270 degrees and in the fasciectomy group 50 (IQR 41-60) degrees ( $p=0.007$ ).  
22  
23  
24

25 271 No complications were observed in any of the groups at the final follow-up.  
26  
27  
28  
29  
30  
31  
32  
33  
34  
35  
36  
37  
38  
39  
40  
41  
42  
43  
44  
45  
46  
47  
48  
49  
50  
51  
52  
53  
54  
55  
56  
57  
58  
59  
60

1  
2  
3 272 **DISCUSSION**

4  
5 273

6  
7 274 Our study shows that treatment of DC with a single collagenase injection is associated with  
8  
9 275 lower costs than surgery (fasciectomy) and the short-term outcomes (6 weeks) regarding  
10  
11 276 reduction in finger joint contractures are similar. The costs are still lower when assuming that  
12  
13 277 20% of the patients would require 2 injections in the same hand, but if more than 5 of 10  
14  
15 278 patients need 2 injections the costs would exceed those of fasciectomy. Our estimates of the  
16  
17 279 costs assuming 20% would require 2 injections were based on separate treatment sessions; the  
18  
19 280 costs would be even lower if the 2 injections are given in the same session, which would  
20  
21 281 probably become the usual practice.<sup>12</sup> Further, our results should be considered conservative  
22  
23 282 since we have not considered complications (such as wound infection and chronic regional  
24  
25 283 pain syndrome) that are probably more frequent after surgery than after CCH injections and  
26  
27 284 would therefore add to the total costs. The study by Hurst et al.<sup>7</sup> reported use of an average of  
28  
29 285 about 2 CCH injections per patient. However, in that study finger extension, which often is a  
30  
31 286 painful procedure, was done without anaesthesia, which may have reduced the degree of  
32  
33 287 initial contracture correction and thus necessitating a second injection. As in our study, use of  
34  
35 288 local anaesthesia is currently the standard procedure. In addition, Hurst et al. injected 0.58 mg  
36  
37 289 CCH into one part of the cord whereas our technique is to inject the whole content of a single  
38  
39 290 CCH injection (0.9 mg) into the cord at multiple sites, which would probably increase the  
40  
41 291 efficacy of a single injection.

42  
43 292

44  
45 293 For fasciectomy, the largest cost was represented by the various costs associated with a day-  
46  
47 294 surgery procedure of approximately 1 hour duration in the operating room. The cost would be  
48  
49 295 lower if the average operating time were shorter than our estimate of 62 minutes. In a recent  
50  
51 296 study of DC in 12 European countries (based on a surgeon survey and patient chart review),  
52  
53  
54  
55  
56  
57  
58  
59  
60

1  
2  
3 297 the mean operating time for fasciectomy across all countries was 67 minutes (Nordic 63,  
4  
5 298 Eastern 69, Western 66, and Mediterranean 68 minutes).<sup>4</sup> A potential advantage with CCH  
6  
7 299 injections is the possibility to treat patients with bilateral disease in 1 stage, which is  
8  
9 300 uncommon with surgery considering the nature of the procedure. In contrast, patients with  
10  
11 301 contractures involving 3 or more fingers can be treated with surgery in one session, but would  
12  
13 302 need at least 2 CCH injections and, in more severe cases, 2 or more treatment sessions.  
14  
15  
16 303

17  
18 304 Skin tears ranging from minor superficial skin breakage to deeper wounds occurred in more  
19  
20 305 than half the patients after CCH injections in our study. Skin tears following CCH injections  
21  
22 306 were reported in 11% in the multicenter randomized trial,<sup>7</sup> and in up to 19% in other  
23  
24 307 studies.<sup>13,14</sup> Skin tears are more likely to occur in severe contractures especially of the small  
25  
26 308 finger.<sup>9</sup> Because the incidence and severity of skin tears (ie, need for wound care) may vary  
27  
28 309 we calculated the costs assuming that, on average, one third of the patients would require 1  
29  
30 310 nurse visit and also did a sensitivity analysis assuming an average of 1 nurse visit. We believe  
31  
32 311 these estimates cover the costs of wound care even if the true incidence of skin tears is higher  
33  
34 312 than previously reported.  
35  
36  
37 313

38  
39 314 We only compared direct costs, and therefore did not include costs of lost productivity or sick  
40  
41 315 leave. Among employed patients, sick leave is more likely to be necessary and longer after  
42  
43 316 fasciectomy than after CCH injections. According to the Swedish Social Insurance Agency  
44  
45 317 the total cost of a 1-week sick leave based on the average salary in Sweden 2011 (including  
46  
47 318 sick-pay, general payroll tax, vacation-pay and overhead costs) exceeds 1300 USD  
48  
49 319 ([www.scb.se](http://www.scb.se)). In addition, the direct costs of CCH injections and fasciectomy may differ  
50  
51 320 across countries and settings. In a Canadian study that estimated the cost (during 2005) of  
52  
53 321 open carpal tunnel release, a 10-minute procedure done under local anaesthesia, the total cost  
54  
55  
56  
57  
58  
59  
60

1  
2  
3 322 (excluding surgeon's fee) was 137 CAD when done in the main operating room and 53 CAD  
4  
5 323 dollars when done in the office.<sup>15</sup> Although the largest treatment cost for CCH injections was  
6  
7 324 the cost of the injection itself, which may be substantially higher in some countries, the costs  
8  
9 325 of surgery in these countries may also be higher. In a study involving 24 patients treated with  
10  
11 326 fasciectomy at a single US hospital from 2008 to 2010 the average direct cost, defined as  
12  
13 327 costs billed from hospital charges (facility fees) and professional charges (surgeon and  
14  
15 328 anaesthesia fees) was estimated to be 11,240 USD.<sup>9</sup>  
16  
17  
18  
19 329  
20  
21 330 A limitation of our study is that only very short-term outcomes were measured. The  
22  
23 331 improvement was high and the minor residual contracture was similar for CCH and  
24  
25 332 fasciectomy. Differences in long-term outcomes may change the cost-effectiveness of these  
26  
27 333 treatments because if they differ substantially in the recurrence rate and the need for further  
28  
29 334 treatments the cost of subsequent treatments should also be considered. According to the most  
30  
31 335 recent published data regarding recurrence after CCH injections (defined as contracture  
32  
33 336 increase of 20 degrees or greater in the presence of a palpable cord in joints initially corrected  
34  
35 337 to a maximum of 5-degree contracture), the overall rate in 623 joints at 3 years was 35%  
36  
37 338 (MCP 27% and PIP 56%) but the recurrence required treatment in only 7%.<sup>16</sup> Following  
38  
39 339 fasciectomy a 3-year recurrence rate of 12% has been reported in two studies; in the first  
40  
41 340 study, 4 of 33 hands had more than 30 degrees increase in joint contracture compared to 6  
42  
43 341 weeks,<sup>11</sup> and in the second study, 11 of 90 fingers showed progressive recurrence of PIP joint  
44  
45 342 contracture but no specific definition of recurrence was stated.<sup>17</sup> Thus, depending on the  
46  
47 343 proportion of patients that subsequently need repeated treatment because of recurrent  
48  
49 344 contracture in the treated fingers it is possible that in the long-term the direct costs of  
50  
51 345 treatment with CCH may exceed those of fasciectomy.  
52  
53  
54  
55  
56 346  
57  
58  
59  
60

1  
2  
3 347 Another limitation is that in the fasciectomy group the baseline range-of-motion  
4  
5 348 measurements were done by different surgeons and the follow-up measurements by different  
6  
7 349 therapists. The inter-observer reliability of these measurements is unknown and there might  
8  
9 350 be a risk that the surgeon overestimated the preoperative contracture and the treating therapist  
10  
11 351 underestimated residual contracture. However, we do not believe this issue has a substantial  
12  
13 352 influence because fasciectomy was the only treatment option and the results of the post-  
14  
15 353 treatment measurements, done by therapists, were similar in both groups.  
16  
17  
18  
19

20  
21 355 In conclusion, treatment of DC with a single CCH injection costs 33% less, in direct costs,  
22  
23 356 than fasciectomy with equivalent short-term efficacy (6 weeks) regarding reduction in  
24  
25 357 contracture.  
26

27 358  
28  
29  
30  
31  
32  
33  
34  
35  
36  
37  
38  
39  
40  
41  
42  
43  
44  
45  
46  
47  
48  
49  
50  
51  
52  
53  
54  
55  
56  
57  
58  
59  
60

1  
2  
3 359 **Funding**  
4

5 360  
6

7 361 This research was supported by Hässleholm Hospital. The funding source (public hospital)  
8  
9 362 had no role in the conduct of the study, data analysis and interpretation, or decision to submit  
10  
11 363 the article for publication. No commercial entities were involved at any stage.  
12

13 364  
14

15 365  
16

17  
18 366 **Acknowledgements**  
19

20 367  
21

22  
23 368 The authors acknowledge the valuable help from Ms Saskia Titman, anaesthesia nurse, and  
24

25 369 Ms Marie Davidsson, research coordinator, Department of Orthopedics, Hässleholm Hospital.  
26

27 370  
28  
29  
30  
31  
32  
33  
34  
35  
36  
37  
38  
39  
40  
41  
42  
43  
44  
45  
46  
47  
48  
49  
50  
51  
52  
53  
54  
55  
56  
57  
58  
59  
60

## REFERENCES

1. Desai SS, Hentz VR. The treatment of Dupuytren disease. *J Hand Surg Am* 2011;36:936-42.
2. Statistical Databse. *The National Board of health and Welfare* 2013. Available at <http://www.socialstyrelsen.se/statistik/statistikdatabas/dagkirurgi>. Accessed 14-09-2013.
3. Skåne County. Annual Report. *Skåne County* 2010. Available at [http://www.skane.se/upload/Webbplatser/Skaneportalen-extern/OmRegionSkane/ekonomi/arsredovisning/2010/ÅR\\_2010\\_110426.pdf](http://www.skane.se/upload/Webbplatser/Skaneportalen-extern/OmRegionSkane/ekonomi/arsredovisning/2010/ÅR_2010_110426.pdf). Accessed 14-09-2013.
4. Dias J, Bainbridge C, Leclercq C et al. Surgical management of Dupuytren's contracture in Europe: regional analysis of a surgeon survey and patient chart review. *Int J Clin Pract* 2013;67:271-81.
5. Crean SM, Gerber RA, Le Graverand MP, Boyd DM, Cappelleri JC. The efficacy and safety of fasciectomy and fasciotomy for Dupuytren's contracture in European patients: a structured review of published studies. *J Hand Surg Eur Vol* 2011;36:396-407.
6. Hogemann A, Wolfhard U, Kendoff D, Board TN, Olivier LC. Results of total aponeurotomy for Dupuytren's contracture in 61 patients: a retrospective clinical study. *Arch Orthop Trauma Surg* 2009;129:195-201.
7. Hurst LC, Badalamente MA, Hentz VR et al. Injectable collagenase clostridium histolyticum for Dupuytren's contracture. *N Engl J Med* 2009;361:968-79.
8. Chen NC, Shauver MJ, Chung KC. Cost-effectiveness of open partial fasciectomy, needle aponeurotomy, and collagenase injection for dupuytren contracture. *J Hand Surg Am* 2011;36:1826-34.
9. Herrera FA, Benhaim P, Suliman A, Roostaeian J, Azari K, Mitchell S. Cost Comparison of Open Fasciectomy Versus Percutaneous Needle Aponeurotomy for Treatment of Dupuytren Contracture. *Ann Plast Surg* 2013;70:454-6.
10. Hurst L. Dupuytren's contracture. In: Green's Operative Hand Surgery. 6th Edition ed. Wolfe SW, Hotchkiss RN, Pederson WC, Kozin SH. Elsevier; 2010. Philadelphia, PA. p153-4.
11. van Rijssen AL, ter Linden H, Werker PM. Five-year results of a randomized clinical trial on treatment in Dupuytren's disease: percutaneous needle fasciotomy versus limited fasciectomy. *Plast Reconstr Surg* 2012;129:469-77.
12. Coleman S, Gilpin D, Tursi J, Kaufman G, Jones N, Cohen B. Multiple concurrent collagenase clostridium histolyticum injections to Dupuytren's cords: an exploratory study. *BMC Musculoskelet Disord* 2012;13:61.
13. Skirven TM, Bachoura A, Jacoby SM, Culp RW, Osterman AL. The effect of a therapy protocol for increasing correction of severely contracted proximal interphalangeal joints



1  
2  
3  
4  
5  
6  
7  
8  
9  
10  
11  
12  
13  
14  
15  
16  
17  
18  
19  
20  
21  
22  
23  
24  
25  
26  
27  
28  
29  
30  
31  
32  
33  
34  
35  
36  
37  
38  
39  
40  
41  
42  
43  
44  
45  
46  
47  
48  
49  
50  
51  
52  
53  
54  
55  
56  
57  
58  
59  
60

- 410 caused by Dupuytren disease and treated with collagenase injection. *J Hand Surg Am*  
411 2013;38:684-9.
- 412 14. Manning CJ, Delaney R, Hayton MJ. Efficacy and tolerability of Day 2 manipulation  
413 and local anaesthesia after collagenase injection in patients with Dupuytren's  
414 contracture. *J Hand Surg Eur Vol* 2013. Epub ahead of print (PMID:23719171).
- 415 15. Leblanc MR, Lalonde J, Lalonde DH. A detailed cost and efficiency analysis of  
416 performing carpal tunnel surgery in the main operating room versus the ambulatory  
417 setting in Canada. *Hand (N Y)* 2007;2:173-8.
- 418 16. Peimer CA, Blazar P, Coleman S et al. Dupuytren contracture recurrence following  
419 treatment with collagenase clostridium histolyticum (CORDLESS study): 3-year data. *J*  
420 *Hand Surg Am* 2013;38:12-22.
- 421 17. Ullah AS, Dias JJ, Bhowal B. Does a 'firebreak' full-thickness skin graft prevent  
422 recurrence after surgery for Dupuytren's contracture?: a prospective, randomised trial. *J*  
423 *Bone Joint Surg Br* 2009;91:374-8.
- 424  
425  
426

427 **Table 1** Characteristics of the two samples of patients with Dupuytren's contracture treated with  
 428 collagenase clostridium histolyticum injection or surgery (fasciectomy)

|                              | CCH injection | Fasciectomy |
|------------------------------|---------------|-------------|
| Number of patients (men)     | 16 (11)       | 16 (13)     |
| Age (yrs), mean (SD)         | 69 (4)        | 71 (5)      |
| Number of fingers treated*   |               |             |
| Small                        | 11            | 9           |
| Ring                         | 7             | 8           |
| Middle                       | 0             | 1           |
| Extension deficit (degrees)  |               |             |
| Total <sup>†</sup> mean (SD) | 90 (39)       | 71 (28)     |
| median (IQR)                 | 70 (60-115)   | 75 (45-89)  |
| MCP <sup>‡</sup> mean (SD)   | 64 (16)       | 60 (17)     |
| median (IQR)                 | 65 (60-75)    | 60 (41-80)  |
| PIP <sup>‡</sup> mean (SD)   | 55 (22)       | 46 (18)     |
| median (IQR)                 | 55 (43-70)    | 40 (35-48)  |

429  
 430 CCH, collagenase clostridium histolyticum; IQR, interquartile range

431 \* 2 patients in each group had 2 fingers treated.

432 <sup>†</sup> Metacarpophalangeal (MCP) plus proximal interphalangeal (PIP) joints in all treated fingers (in  
 433 patients with 2 fingers treated the finger with largest extension deficit was used).

434 <sup>‡</sup> The values showing MCP and PIP extension deficits separately include only joints with contracture  
 435 (no MCP contracture in 1 patient in the CCH group and 2 patients in the fasciectomy group and no  
 436 PIP contracture in 7 patients in each group).

437 **Table 2** Cost specification for the various stages of treating Dupuytren's contracture  
 438 with collagenase clostridium histolyticum injection or surgery (fasciectomy)

|                                                     | Personnel costs <sup>*</sup> | Other costs <sup>†</sup> |
|-----------------------------------------------------|------------------------------|--------------------------|
|                                                     | (USD)                        | (USD)                    |
| Doctor visit, CCH or fasciectomy (doctor and nurse) | 65.80                        | 16.78                    |
| Injection, CCH (doctor and nurse)                   | 70.63                        | 991.16                   |
| Finger extension, CCH (doctor and nurse)            | 70.63                        | 20.97                    |
| Therapist visit, CCH                                | 26.58                        | 25.16                    |
| Surgery, fasciectomy (doctors and others)           | 783.97                       | 380.81                   |
| Day surgery care, fasciectomy                       | 88.10                        | 52.41                    |
| Therapist visit, fasciectomy                        | 39.88                        | 37.77                    |
| Nurse visit, CCH or fasciectomy                     | 43.51                        | 37.77                    |

439  
 440 CCH, collagenase clostridium histolyticum; USD, United States dollars

441 \*Include average salary, social security contributions, vacation pay, sick pay, overhead costs, and the  
 442 degree of capacity utilization.

443 †Include costs of surgical and other materials, injections, premises, etc.

444 Price of 1 CCH injection = 970.19 USD.

445 **Table 3** Number of visits to medical personnel, actual costs and short-term outcomes of treating  
 446 Dupuytren's contracture with collagenase clostridium histolyticum injection or surgery (fasciectomy)

|                                                               | CCH injection | Fasciectomy        |
|---------------------------------------------------------------|---------------|--------------------|
| Mean, median (IQR) number of visits to:                       |               |                    |
| Doctor                                                        | 3*            | 2*                 |
| Nurse                                                         | 0.33*         | 3.0, 3.0 (2.0-3.8) |
| Therapist                                                     | 3*            | 5.1, 4.0 (3.0-6.8) |
| Total cost per patient (USD)                                  | 1418.04       | 2102.56            |
| Total cost per patient when<br>20% require 2 injections (USD) | 1675.24       | 2102.56            |
| Extension deficit (degrees) <sup>†</sup>                      |               |                    |
| Total                                                         | mean (SD)     | 20 (25)            |
|                                                               | median (IQR)  | 19 (19)            |
|                                                               |               | 10 (0-30)          |
|                                                               |               | 10 (0-34)          |
| MCP                                                           | mean (SD)     | 10 (17)            |
|                                                               | median (IQR)  | 8 (10)             |
|                                                               |               | 0 (0-15)           |
|                                                               |               | 0 (0-20)           |
| PIP                                                           | mean (SD)     | 23 (18)            |
|                                                               | median (IQR)  | 21 (13)            |
|                                                               |               | 20 (8-35)          |
|                                                               |               | 25 (8-33)          |

447 CCH, collagenase clostridium histolyticum; IQR, interquartile range; USD, United States dollars  
 448

449 \* Number of visits to a doctor in both groups and to a therapist in the CCH group was similar for all  
 450 patients (Figure 1); a third of CCH patients assumed to require 1 visit to a nurse.

451 <sup>†</sup> Metacarpophalangeal (MCP) plus proximal interphalangeal (PIP) joints in all treated fingers. The  
 452 values showing MCP and PIP extension deficits separately include only joints with pretreatment  
 453 contracture (see footnote in Table 1).

1  
2  
3 454 **Figure legend**

4  
5 455

6  
7 456 **Figure 1.** Diagram showing the various stages of treating patients with Dupuytren's  
8  
9  
10 457 contracture with collagenase clostridium histolyticum (CCH) injection or with fasciectomy as  
11  
12 458 a day-surgery procedure performed in the operating room (OR). The number of visits is 1  
13  
14 459 unless specified otherwise.

15  
16  
17  
18  
19  
20  
21  
22  
23  
24  
25  
26  
27  
28  
29  
30  
31  
32  
33  
34  
35  
36  
37  
38  
39  
40  
41  
42  
43  
44  
45  
46  
47  
48  
49  
50  
51  
52  
53  
54  
55  
56  
57  
58  
59  
60

For peer review only

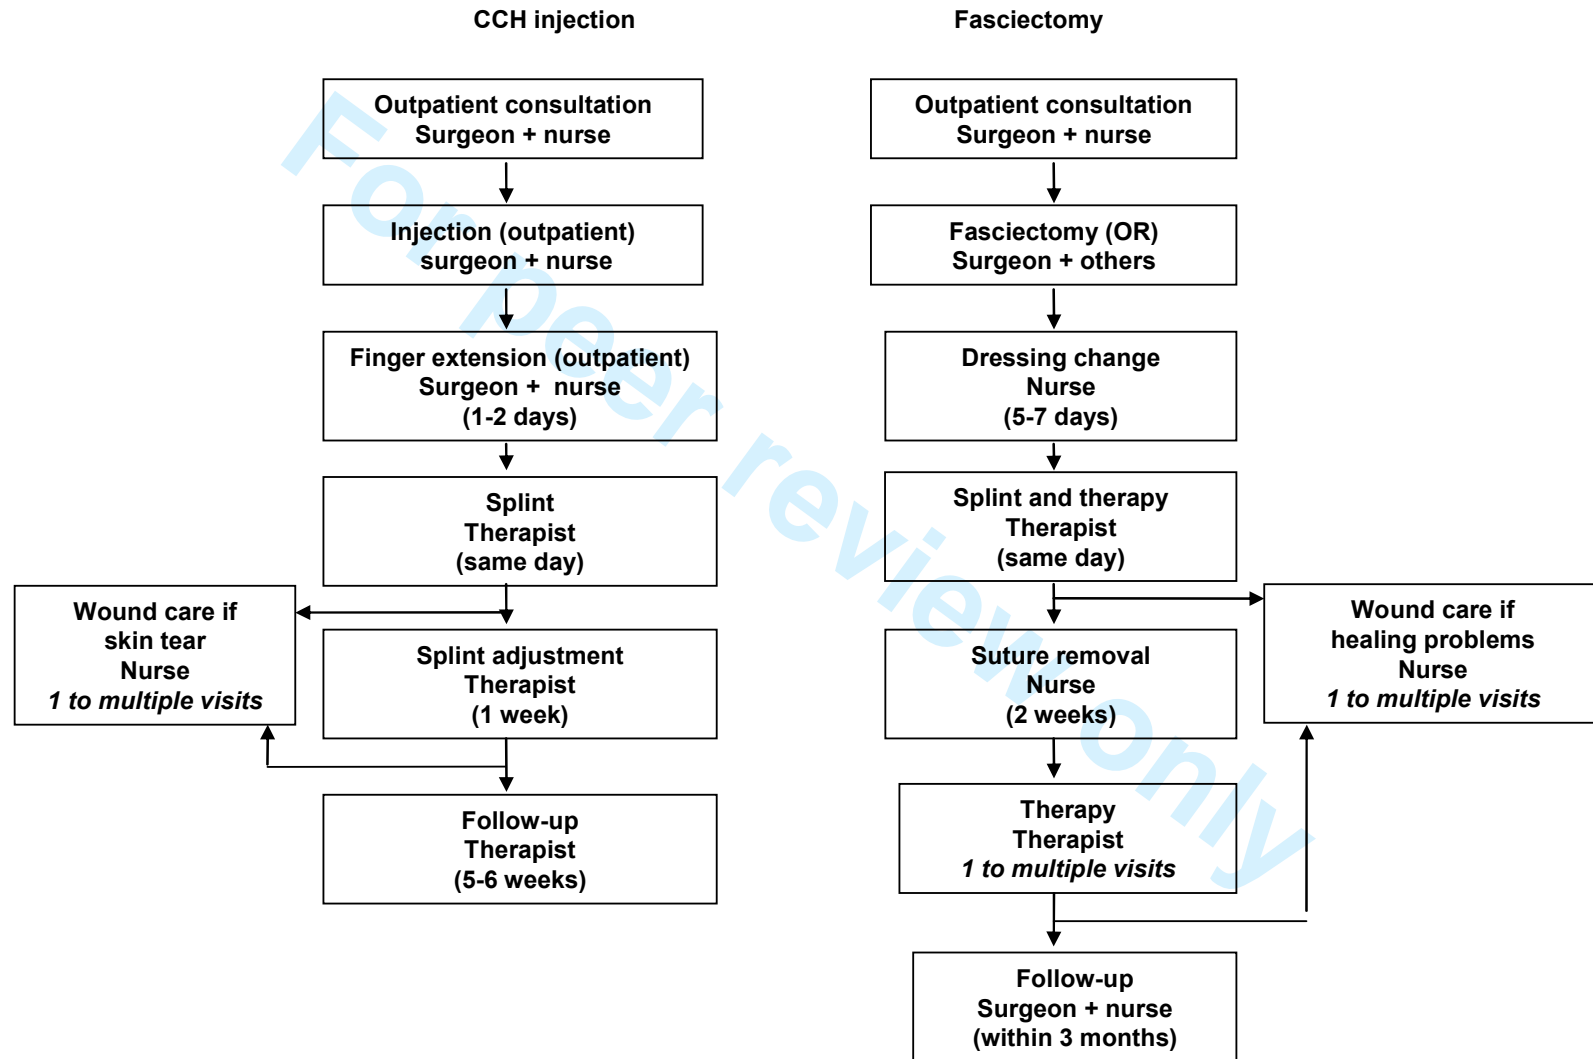

## STROBE Statement—checklist of items that should be included in reports of observational studies

|                                               | Item No | Recommendation                                                                                                                                                                                                                                                                                                                                                                                                                                                                                                                                                                                                                                                                                   |
|-----------------------------------------------|---------|--------------------------------------------------------------------------------------------------------------------------------------------------------------------------------------------------------------------------------------------------------------------------------------------------------------------------------------------------------------------------------------------------------------------------------------------------------------------------------------------------------------------------------------------------------------------------------------------------------------------------------------------------------------------------------------------------|
| <b>Title and abstract</b><br><b>P 1+2</b>     | 1       | (a) Indicate the study's design with a commonly used term in the title or the abstract<br>(b) Provide in the abstract an informative and balanced summary of what was done and what was found                                                                                                                                                                                                                                                                                                                                                                                                                                                                                                    |
| <b>Introduction</b>                           |         |                                                                                                                                                                                                                                                                                                                                                                                                                                                                                                                                                                                                                                                                                                  |
| Background/rationale<br><b>P 4-5</b>          | 2       | Explain the scientific background and rationale for the investigation being reported                                                                                                                                                                                                                                                                                                                                                                                                                                                                                                                                                                                                             |
| Objectives<br><b>P 5</b>                      | 3       | State specific objectives, including any prespecified hypotheses                                                                                                                                                                                                                                                                                                                                                                                                                                                                                                                                                                                                                                 |
| <b>Methods</b>                                |         |                                                                                                                                                                                                                                                                                                                                                                                                                                                                                                                                                                                                                                                                                                  |
| Study design<br><b>P 6</b>                    | 4       | Present key elements of study design early in the paper                                                                                                                                                                                                                                                                                                                                                                                                                                                                                                                                                                                                                                          |
| Setting<br><b>P 6</b>                         | 5       | Describe the setting, locations, and relevant dates, including periods of recruitment, exposure, follow-up, and data collection                                                                                                                                                                                                                                                                                                                                                                                                                                                                                                                                                                  |
| Participants<br><b>P 6</b>                    | 6       | (a) <i>Cohort study</i> —Give the eligibility criteria, and the sources and methods of selection of participants. Describe methods of follow-up<br><i>Case-control study</i> —Give the eligibility criteria, and the sources and methods of case ascertainment and control selection. Give the rationale for the choice of cases and controls<br><i>Cross-sectional study</i> —Give the eligibility criteria, and the sources and methods of selection of participants<br>(b) <i>Cohort study</i> —For matched studies, give matching criteria and number of exposed and unexposed<br><i>Case-control study</i> —For matched studies, give matching criteria and the number of controls per case |
| Variables<br><b>P 8-10</b>                    | 7       | Clearly define all outcomes, exposures, predictors, potential confounders, and effect modifiers. Give diagnostic criteria, if applicable                                                                                                                                                                                                                                                                                                                                                                                                                                                                                                                                                         |
| Data sources/<br>measurement<br><b>P 7-10</b> | 8*      | For each variable of interest, give sources of data and details of methods of assessment (measurement). Describe comparability of assessment methods if there is more than one group                                                                                                                                                                                                                                                                                                                                                                                                                                                                                                             |
| Bias<br><b>P 10-11</b>                        | 9       | Describe any efforts to address potential sources of bias                                                                                                                                                                                                                                                                                                                                                                                                                                                                                                                                                                                                                                        |
| Study size<br><b>P 10</b>                     | 10      | Explain how the study size was arrived at                                                                                                                                                                                                                                                                                                                                                                                                                                                                                                                                                                                                                                                        |
| Quantitative variables<br><b>P 10-11</b>      | 11      | Explain how quantitative variables were handled in the analyses. If applicable, describe which groupings were chosen and why                                                                                                                                                                                                                                                                                                                                                                                                                                                                                                                                                                     |
| Statistical methods<br><b>P 10-11</b>         | 12      | (a) Describe all statistical methods, including those used to control for confounding<br>(b) Describe any methods used to examine subgroups and interactions<br>(c) Explain how missing data were addressed<br>(d) <i>Cohort study</i> —If applicable, explain how loss to follow-up was addressed<br><i>Case-control study</i> —If applicable, explain how matching of cases and controls was addressed<br><i>Cross-sectional study</i> —If applicable, describe analytical methods taking account of sampling strategy<br>(e) Describe any sensitivity analyses                                                                                                                                |

Continued on next page

**Results**

|                  |     |                                                                                                                                                                                                                                                          |
|------------------|-----|----------------------------------------------------------------------------------------------------------------------------------------------------------------------------------------------------------------------------------------------------------|
| Participants     | 13* | (a) Report numbers of individuals at each stage of study—eg numbers potentially eligible, examined for eligibility, confirmed eligible, included in the study, completing follow-up, and analysed<br><b>P 12</b><br><b>Figure 1</b>                      |
|                  |     | (b) Give reasons for non-participation at each stage                                                                                                                                                                                                     |
|                  |     | (c) Consider use of a flow diagram                                                                                                                                                                                                                       |
| Descriptive data | 14* | (a) Give characteristics of study participants (eg demographic, clinical, social) and information on exposures and potential confounders<br><b>P 12, Table 1</b>                                                                                         |
|                  |     | (b) Indicate number of participants with missing data for each variable of interest                                                                                                                                                                      |
|                  |     | (c) <i>Cohort study</i> —Summarise follow-up time (eg, average and total amount)                                                                                                                                                                         |
| Outcome data     | 15* | <i>Cohort study</i> —Report numbers of outcome events or summary measures over time<br><b>P 12-13</b><br><b>Table 2 &amp; 3</b>                                                                                                                          |
|                  |     | <i>Case-control study</i> —Report numbers in each exposure category, or summary measures of exposure                                                                                                                                                     |
|                  |     | <i>Cross-sectional study</i> —Report numbers of outcome events or summary measures                                                                                                                                                                       |
| Main results     | 16  | (a) Give unadjusted estimates and, if applicable, confounder-adjusted estimates and their precision (eg, 95% confidence interval). Make clear which confounders were adjusted for and why they were included<br><b>P 12-13</b><br><b>Table 2 &amp; 3</b> |
|                  |     | (b) Report category boundaries when continuous variables were categorized                                                                                                                                                                                |
|                  |     | (c) If relevant, consider translating estimates of relative risk into absolute risk for a meaningful time period                                                                                                                                         |
| Other analyses   | 17  | Report other analyses done—eg analyses of subgroups and interactions, and sensitivity analyses<br><b>P 12-13</b>                                                                                                                                         |

**Discussion**

|                  |    |                                                                                                                                                                                              |
|------------------|----|----------------------------------------------------------------------------------------------------------------------------------------------------------------------------------------------|
| Key results      | 18 | Summarise key results with reference to study objectives<br><b>P 14</b>                                                                                                                      |
| Limitations      | 19 | Discuss limitations of the study, taking into account sources of potential bias or imprecision. Discuss both direction and magnitude of any potential bias<br><b>P 15-16</b>                 |
| Interpretation   | 20 | Give a cautious overall interpretation of results considering objectives, limitations, multiplicity of analyses, results from similar studies, and other relevant evidence<br><b>P 15-16</b> |
| Generalisability | 21 | Discuss the generalisability (external validity) of the study results<br><b>P 15</b>                                                                                                         |

**Other information**

|         |    |                                                                                                                                                                              |
|---------|----|------------------------------------------------------------------------------------------------------------------------------------------------------------------------------|
| Funding | 22 | Give the source of funding and the role of the funders for the present study and, if applicable, for the original study on which the present article is based<br><b>P 17</b> |
|---------|----|------------------------------------------------------------------------------------------------------------------------------------------------------------------------------|

\*Give information separately for cases and controls in case-control studies and, if applicable, for exposed and unexposed groups in cohort and cross-sectional studies.

**Note:** An Explanation and Elaboration article discusses each checklist item and gives methodological background and published examples of transparent reporting. The STROBE checklist is best used in conjunction with this article (freely available on the Web sites of PLoS Medicine at <http://www.plosmedicine.org/>, Annals of Internal Medicine at <http://www.annals.org/>, and Epidemiology at <http://www.epidem.com/>). Information on the STROBE Initiative is available at [www.strobe-statement.org](http://www.strobe-statement.org).
